# Supplementary material for: HO-1 impairs the efficacy of radiotherapy by redistributing cGAS and STING in tumors
Source: PubMed Central journal article supplement (PMC11601901; doi:10.1172/jci181044), 2024-12-02

**Figure 3A**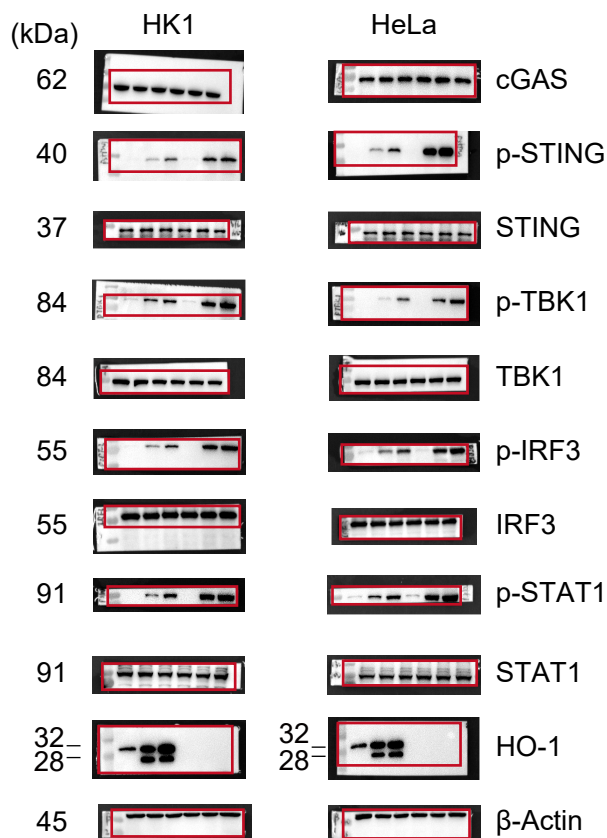**Figure 3D**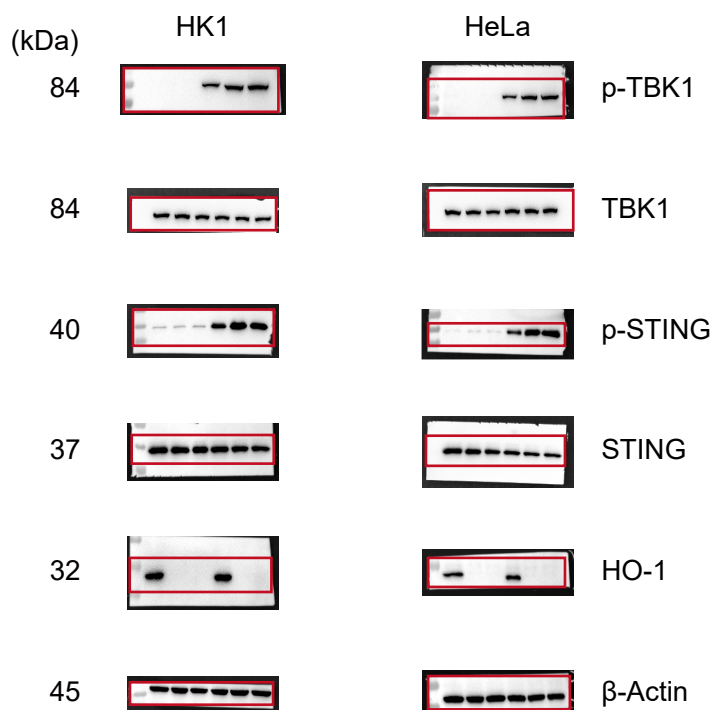**Figure 3E**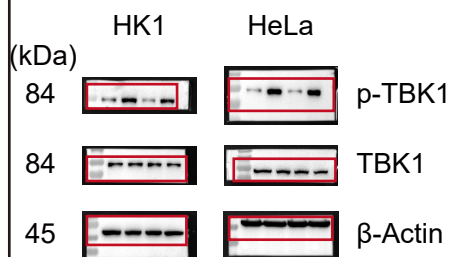**Supplemental Figure 2A**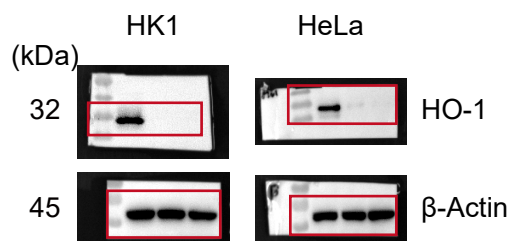**Supplemental Figure 2C**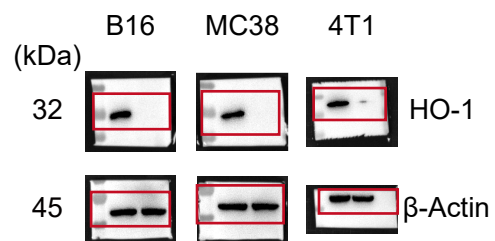**Supplemental Figure 2F**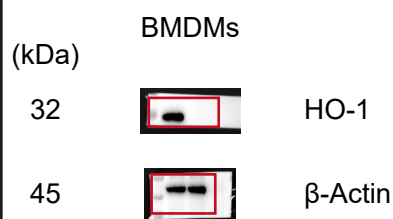**Supplemental Figure 3G**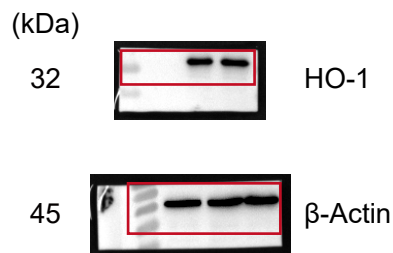**Supplemental Figure 3F**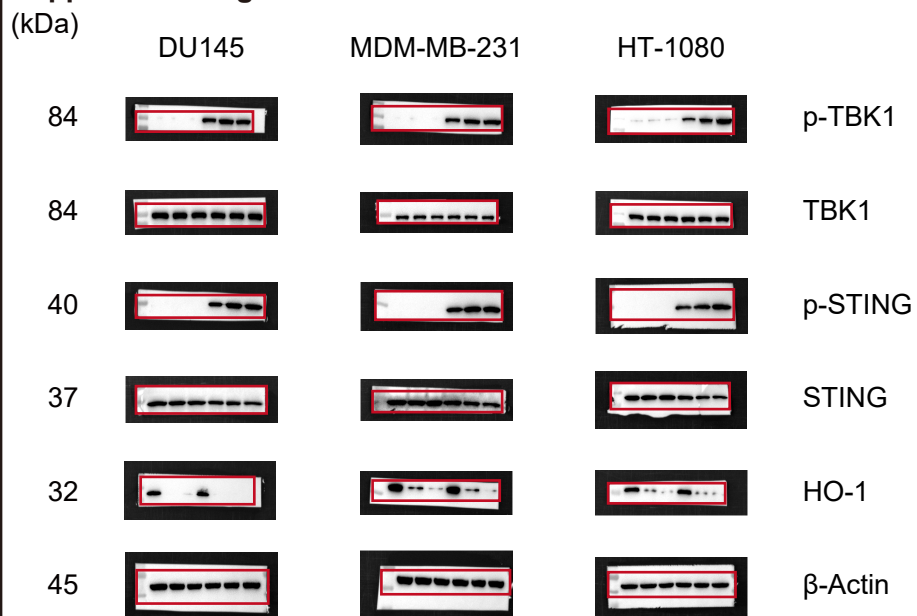

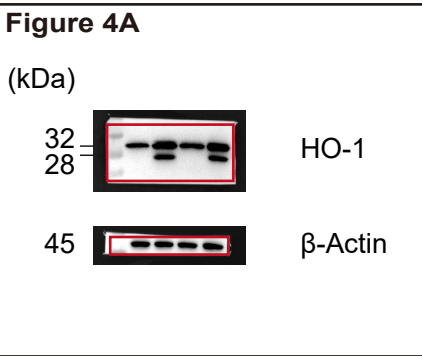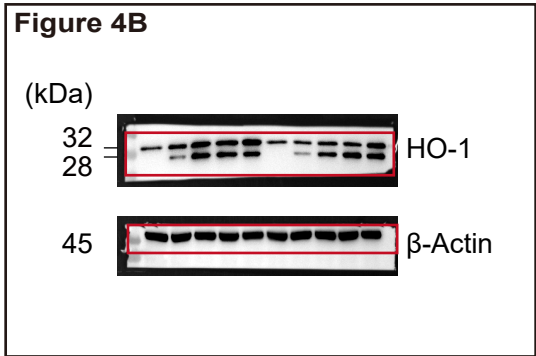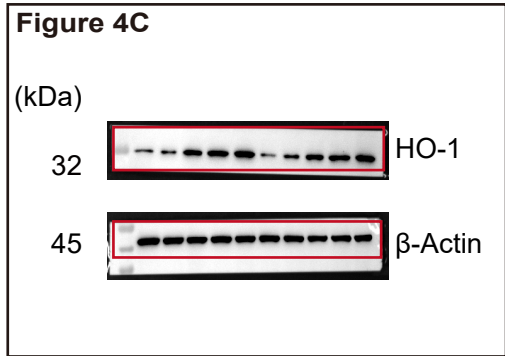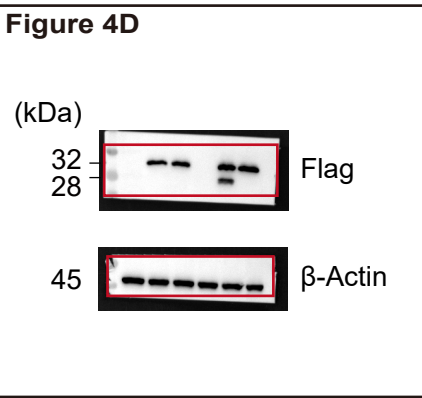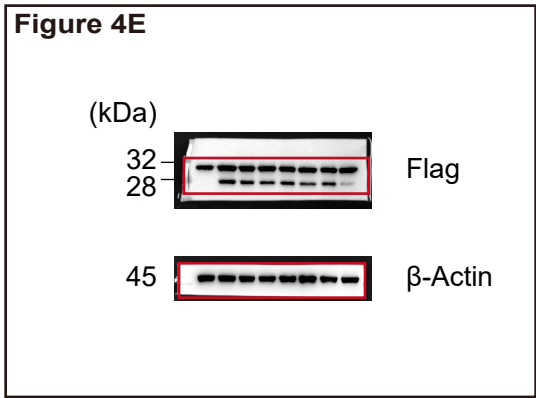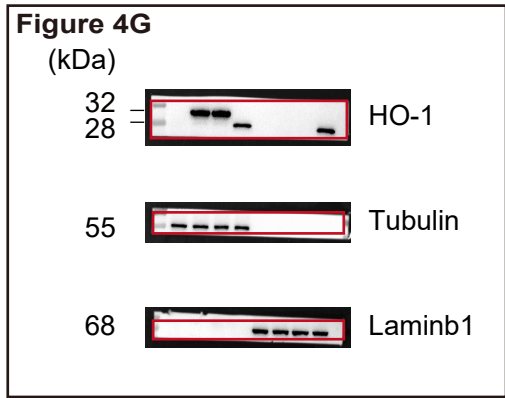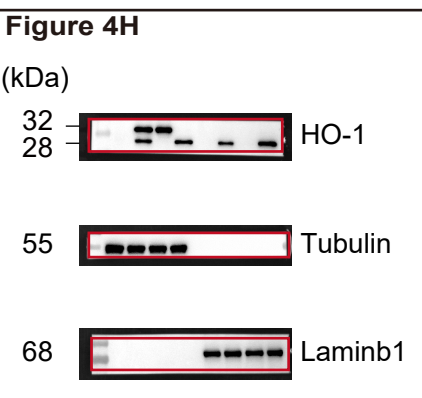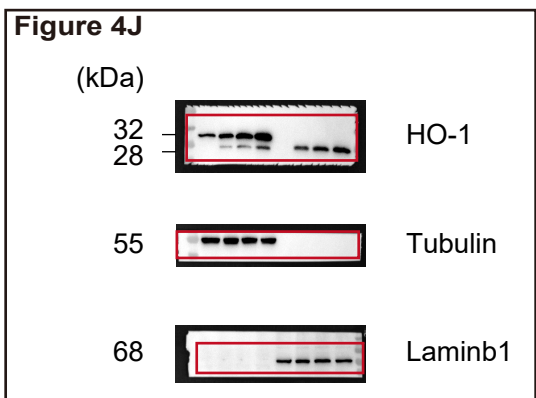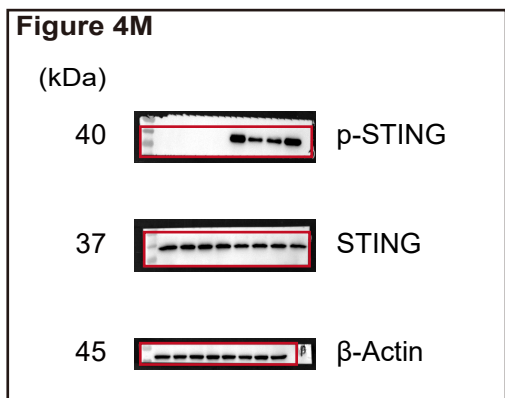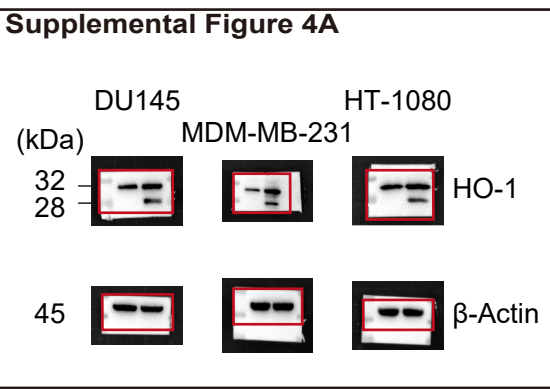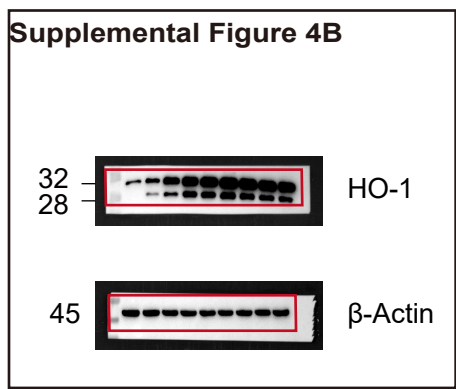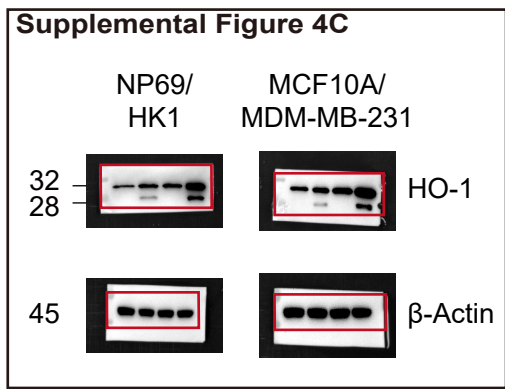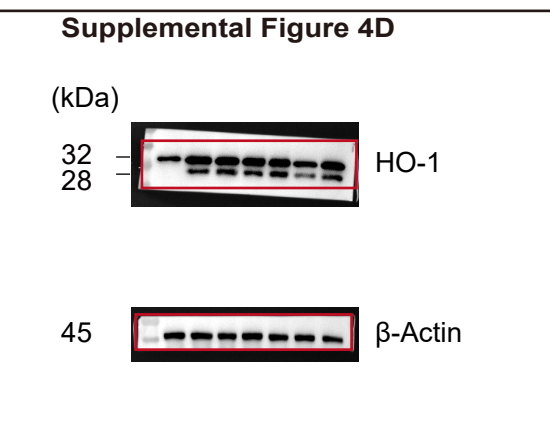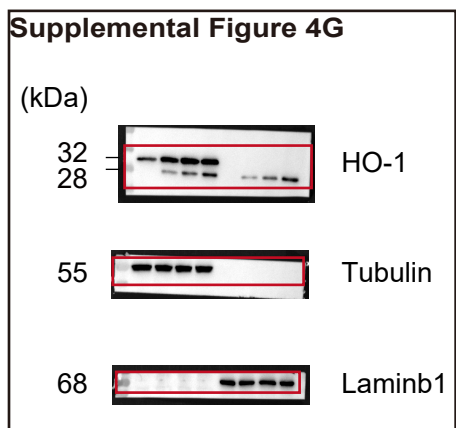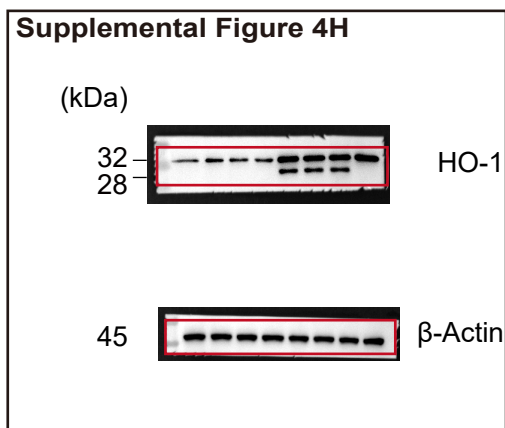

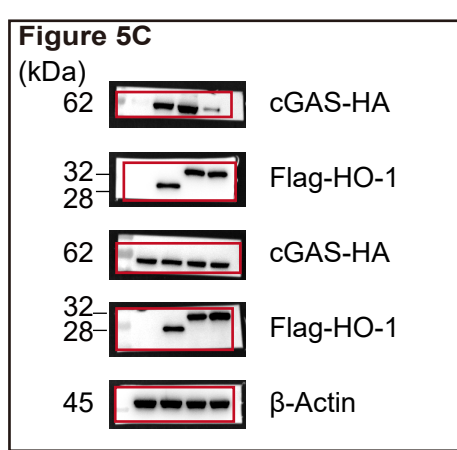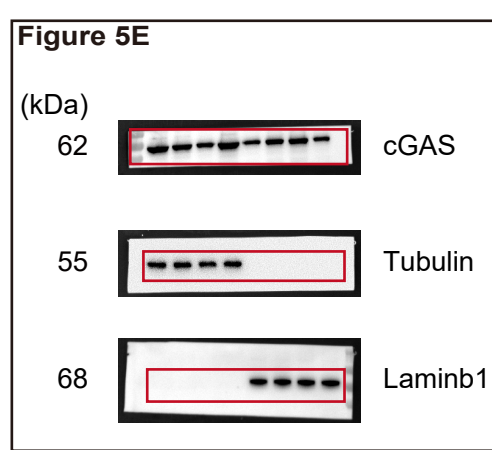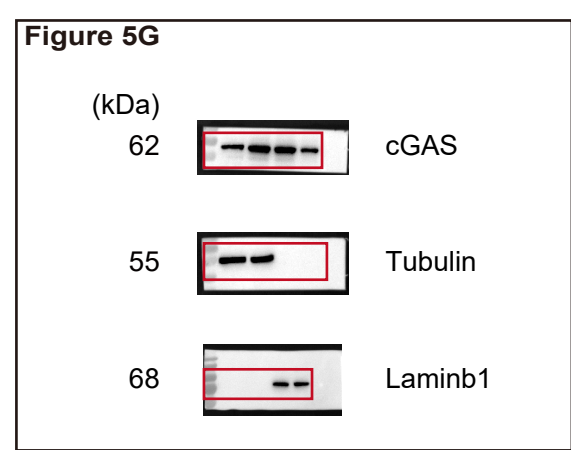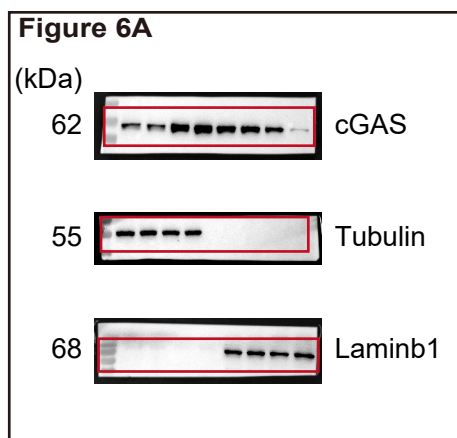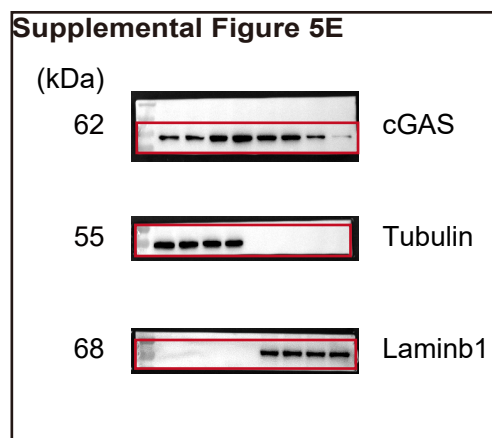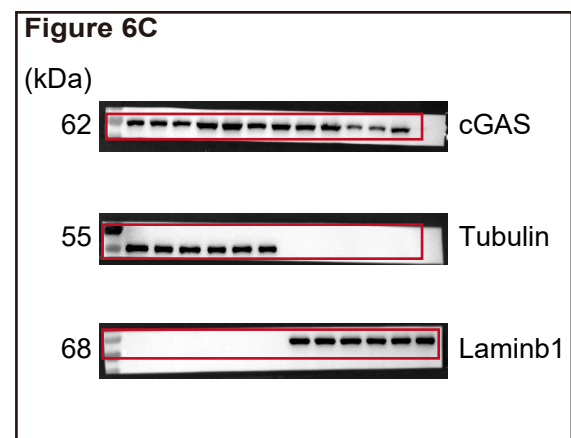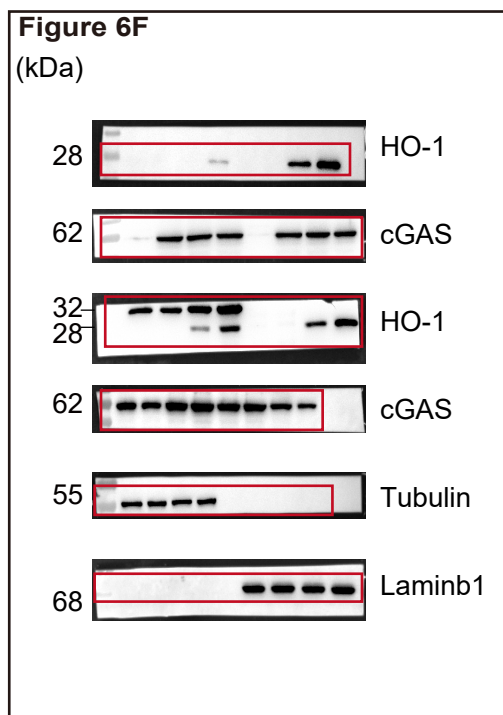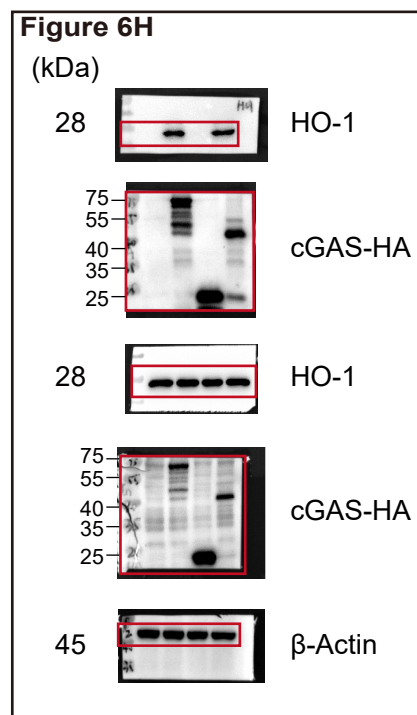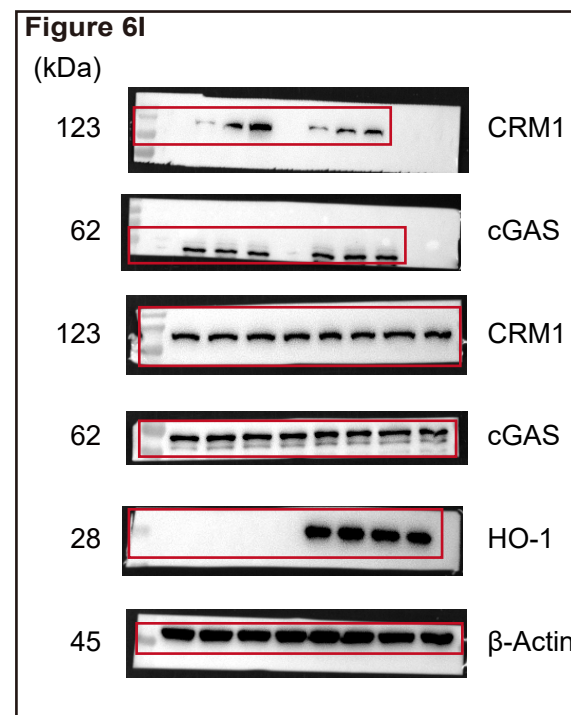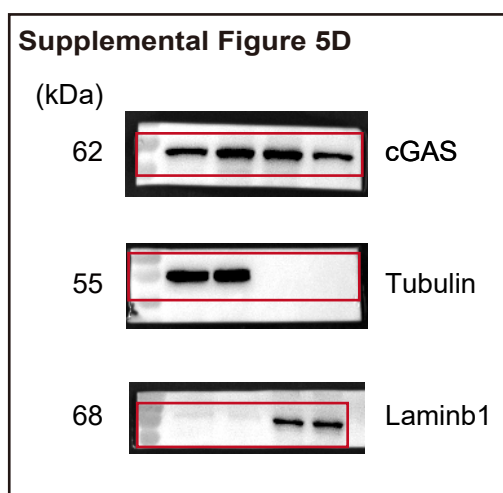

**Figure 7B**

(kDa)

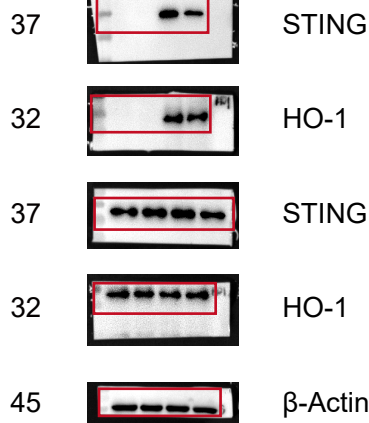**Figure 7E**

(kDa)

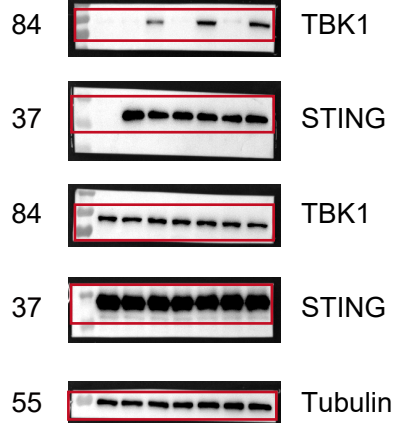**Figure 7F**

(kDa)

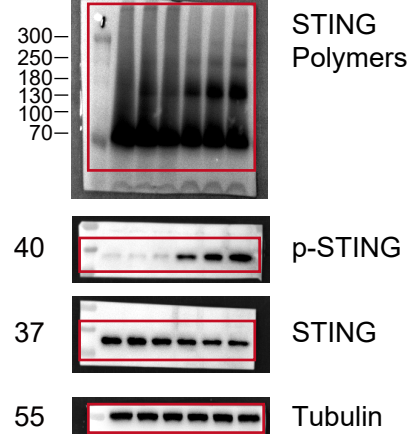**Figure 7G**

(kDa)

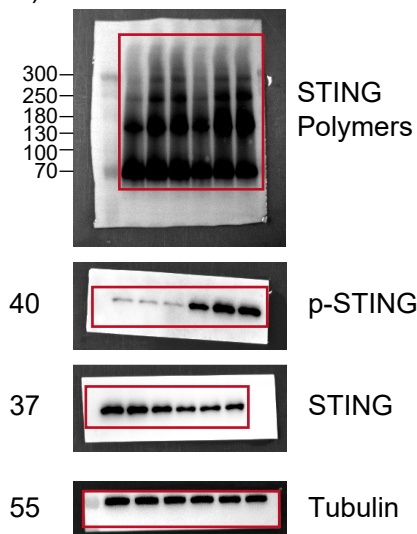**Figure 7I**

(kDa)

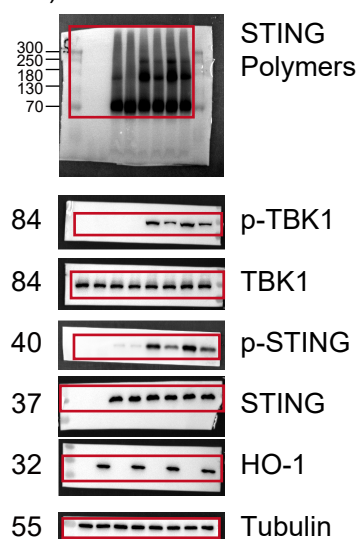**Figure 7J**

(kDa)

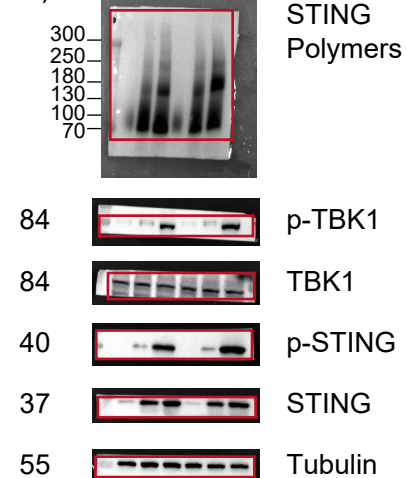**Figure 8B**

(kDa)

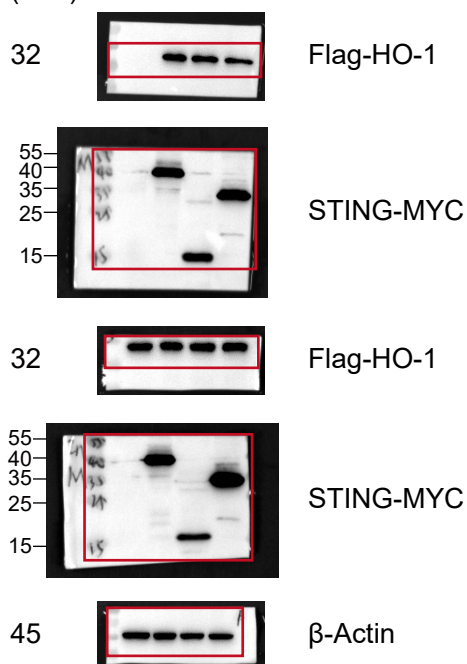**Figure 8D**

(kDa)

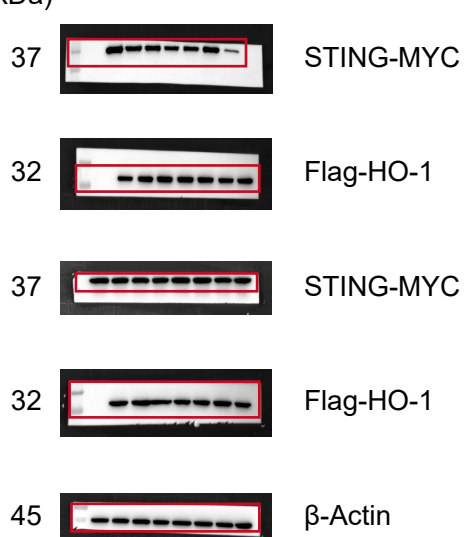**Figure 8E**

(kDa)

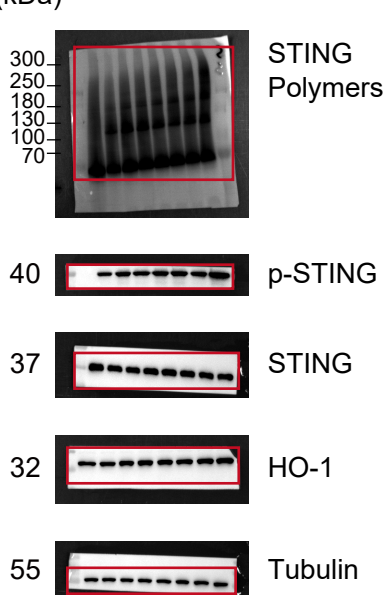



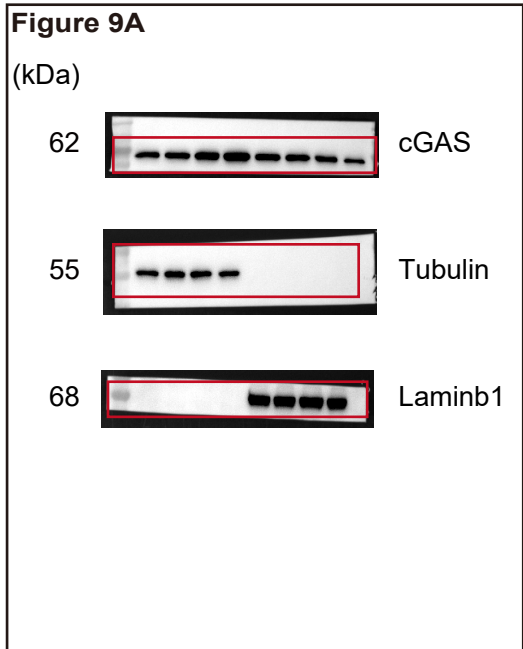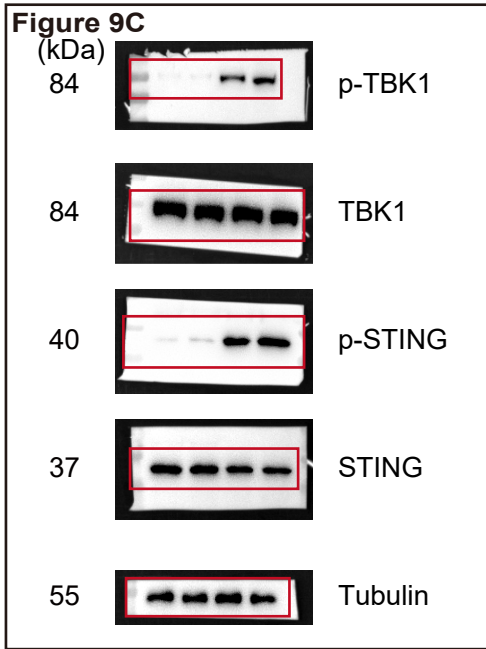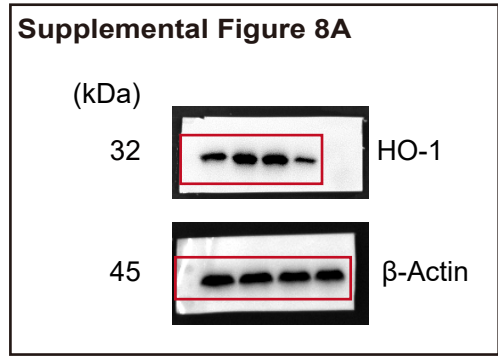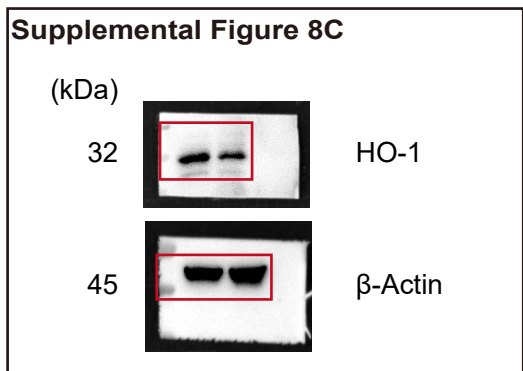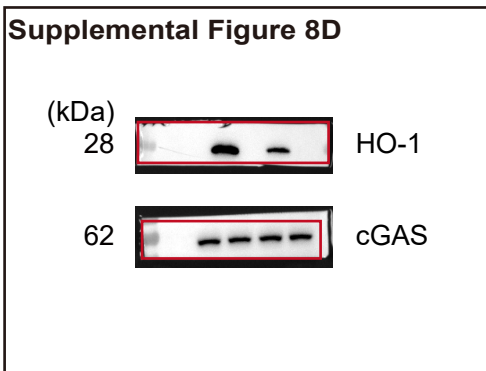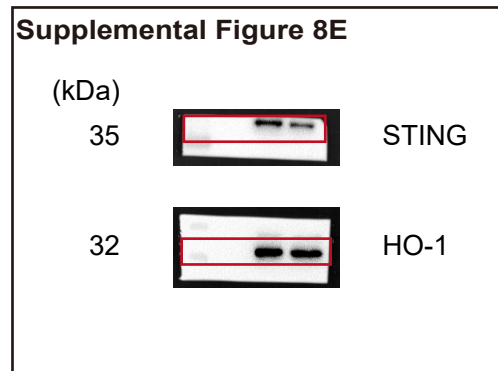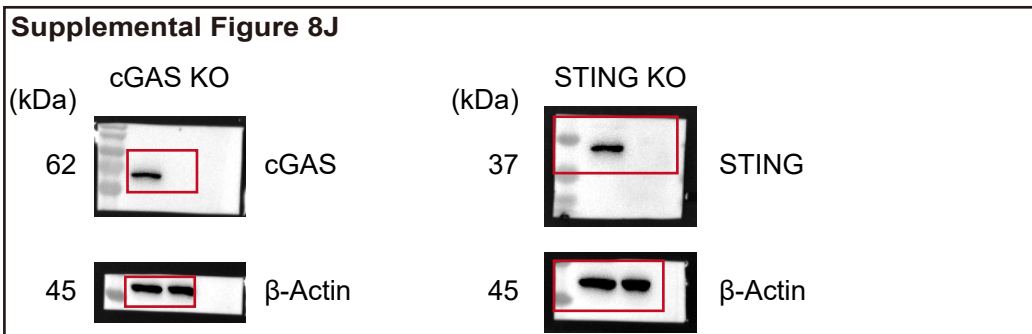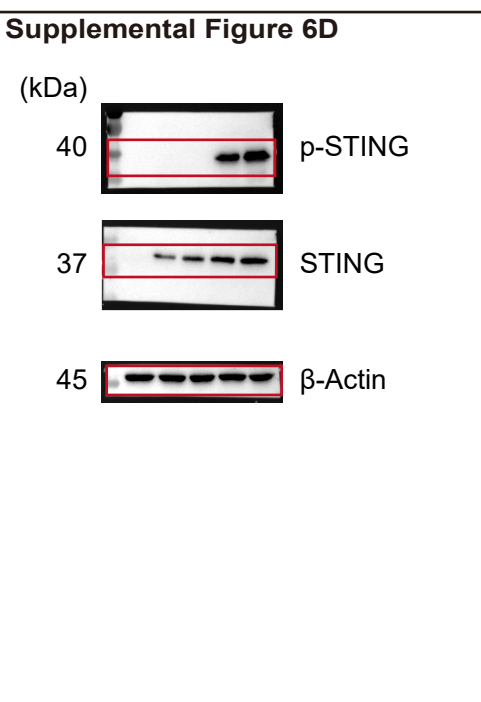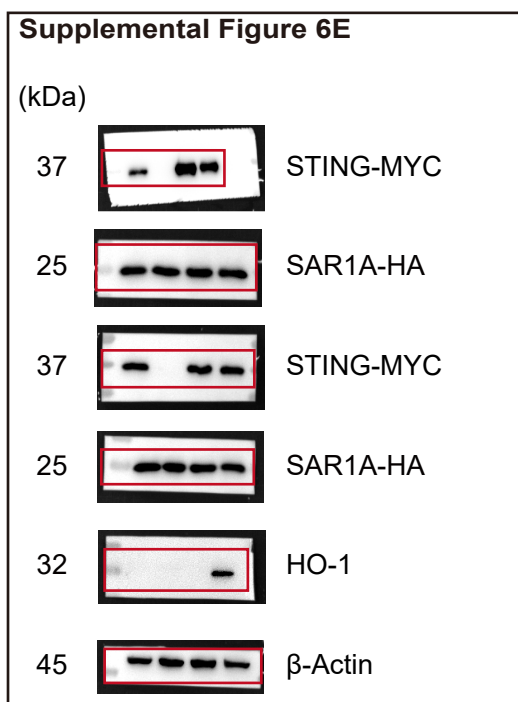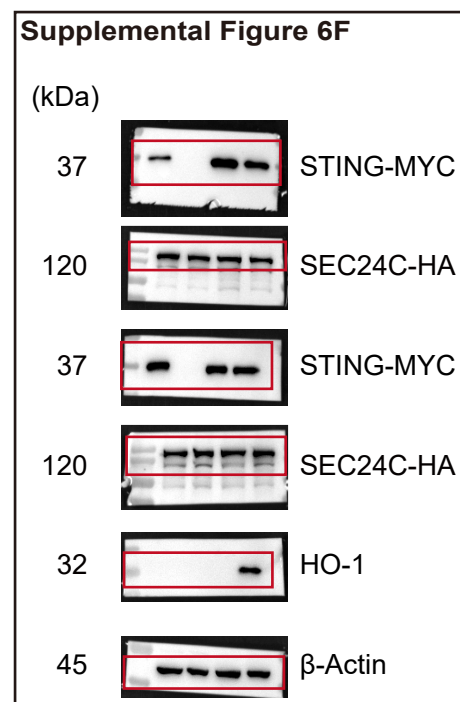

Supplement: jci-134-181044-s085.pdf [file jci-134-181044-s085.pdf]
