# Supplementary material for: HO-1 impairs the efficacy of radiotherapy by redistributing cGAS and STING in tumors
Source: PubMed Central journal article supplement (PMC11601901; doi:10.1172/jci181044), 2024-12-02
Supplement: jci-134-181044-s084.pdf [file jci-134-181044-s084.pdf]

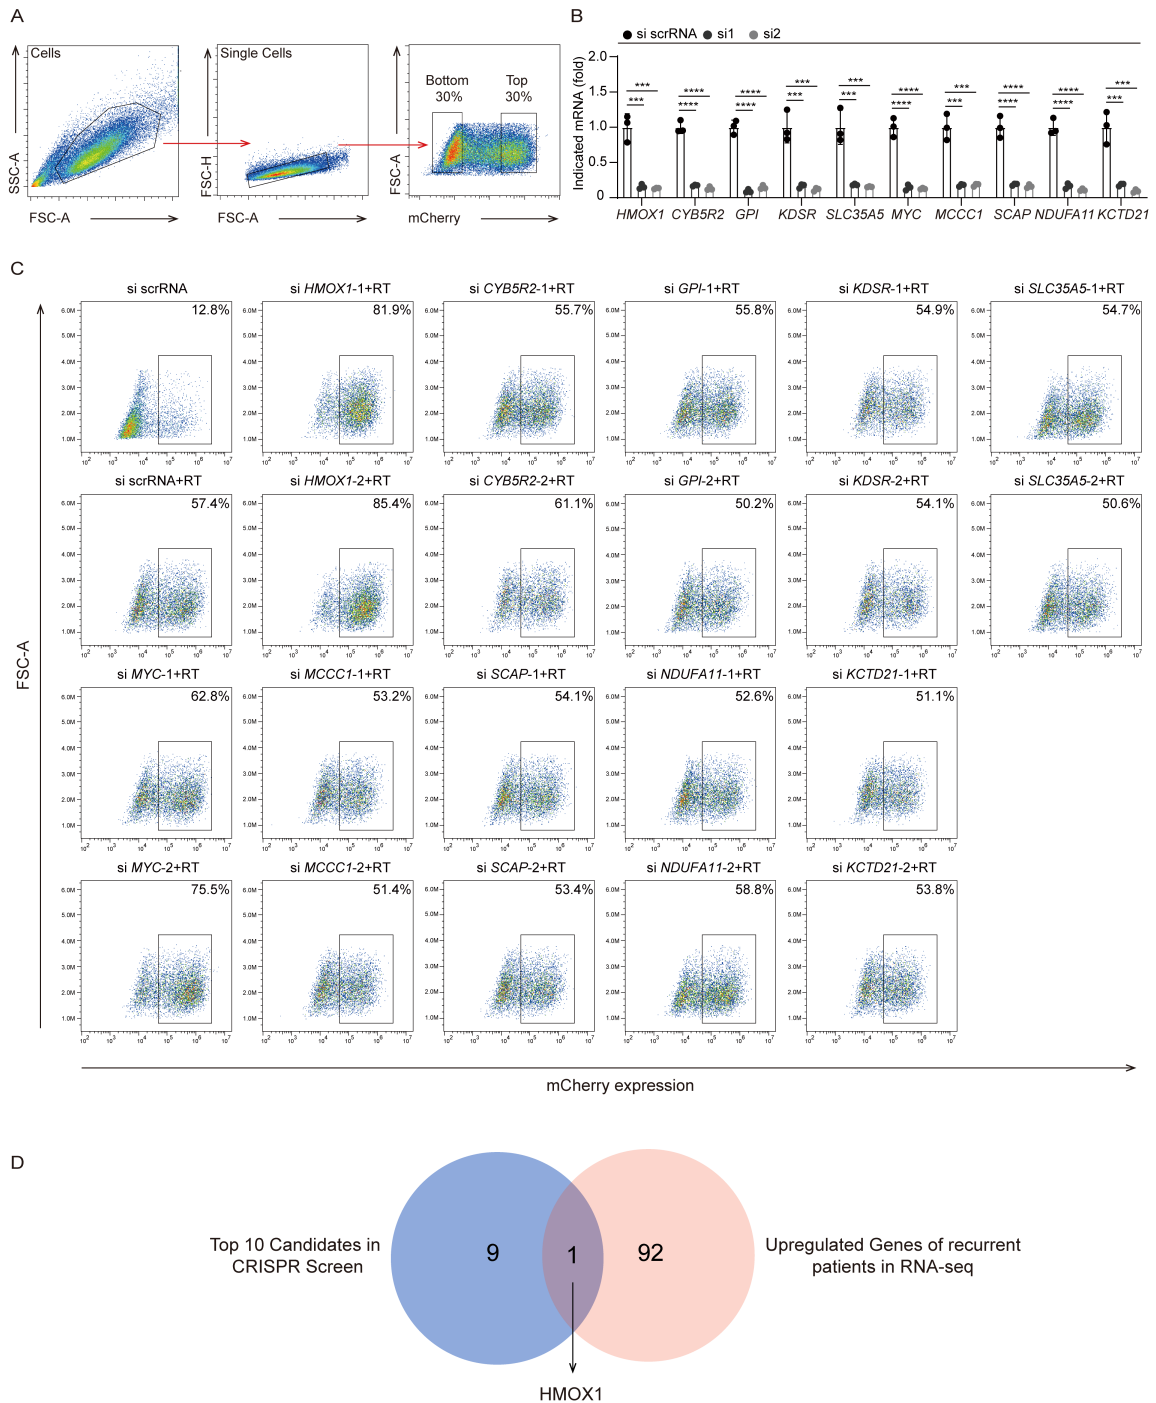

**Supplemental Figure 1. A metabolic CRISPR/Cas9 screen identifies HMOX1 as a potent IFN- $\beta$  production inhibitor in response to radiotherapy.**

(A) Representative gating strategy for flow cytometry-based sorting of the CRISPR screen of reporter-expressing cells stimulated with RT.

(B) mRNA expression for indicated genes knocking-down efficiency (related to 1F-H). *P*-value by One-way ANOVA. *P*-value < 0.05 as statistic difference. \**P*<0.05; \*\**P*<0.01; \*\*\**P*<0.001; \*\*\*\**P*<0.0001. Data are shown as the mean  $\pm$  SD (*n*=3 three biologically independent samples).

(C) Representative flow cytometry exhibition of reporter expression after interfering the top 10 candidates in CRISPR screen.

(D) NPC tissues from at Sun Yat-sen University Cancer Center (SYSUCC) with or without local recurrence after radiotherapy were collected for RNA sequencing analysis. The intersection between top 10 genes in CRISPR screen and 93 upregulated genes in the local recurrence group of RNA-seq.

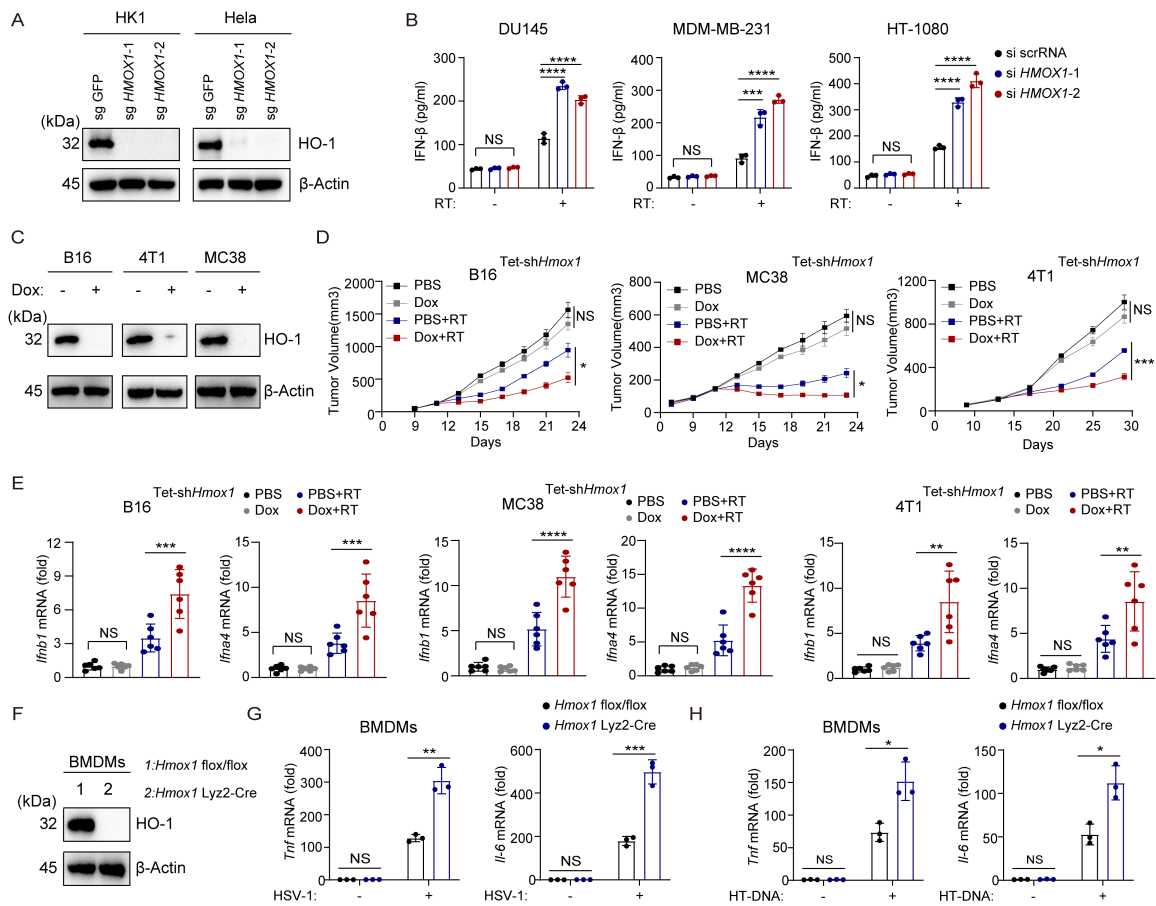

### Supplemental Figure 2. HO-1 inhibits RT-mediated IFN-βs production.

(A) Immunoblot analysis of *HMOX1* knocking-out efficiency in the indicated cell lines.

(B) *HMOX1* was knocked down in the indicated cell lines, following by ELISA of IFN-β content in the supernatant before and after RT stimulation.

(C) Immunoblot analysis of doxycycline (Dox)-induced *Hmx1* knocking-down efficiency in indicated cells.

(D,E) The effect of knocking-down *Hmx1* combined with radiotherapy on tumor growth (D) or typical IFN-β mRNA levels (E) of indicated tumors (n=6 in each group).

(F) Immunoblot analysis of *Hmx1* knocking-out efficiency in BMDMs (related to Figure 2G).

(G,H) *Tnf* and *Il6* mRNA levels of BMDMs from *Hmx1*<sup>fl/fl</sup> and *Hmx1*<sup>fl/fl</sup> Lyz<sup>Cre/Cre</sup> mice. BMDMs were infected with HSV-1 or HT-DNA.

(B,E) *P*-value by One-way ANOVA. Data are shown as the mean ± SD. (D) *P*-value by Two-way ANOVA. Data are shown as the mean ± SEM. (G,H) *P*-value by Student's *t*-test. Data are shown as the mean ± SD. All *P*-value < 0.05 as statistic difference. \**P*<0.05; \*\**P*<0.01; \*\*\**P*<0.001; \*\*\*\**P*<0.0001. n=3 three biologically independent experiments, unless otherwise indicated.

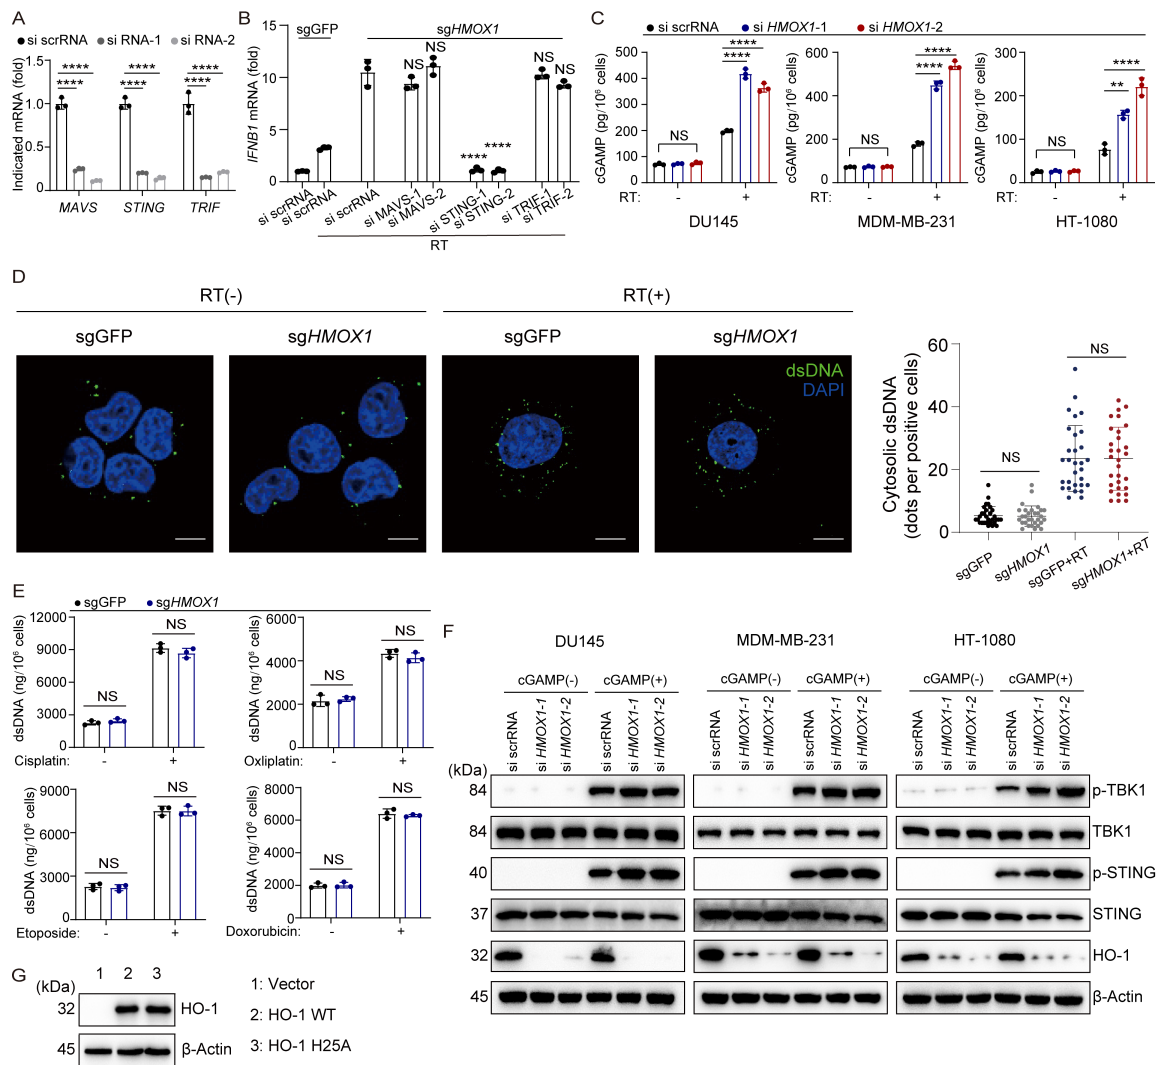

**Supplemental Figure 3. HO-1 inhibits the activity of cGAS and STING under RT independent of its enzymatic activity.**

(A) mRNA levels of indicated genes for knocking-down efficiency.

(B) *IFNβ1* mRNA levels of knocking-down indicated genes with RT treatment. *P*-value was determined by comparing to sgHMOX1+si scrRNA+RT group.

(C) ELISA of cGAMP production of control or *HMOX1* knocked-down cells before and after RT stimulation in the indicated cell lines.

(D) Cytosolic DNA accumulation was assessed by immunofluorescence staining with dsDNA-specific antibody. Representative images (scale bar, 10 μm) and quantitative results are shown (n = 30 cells per group).

(E) Cytoplasmic dsDNA contents in HK1 cells stimulated with indicated chemotherapeutics.

(F) Immunoblot analysis of indicated proteins from control or *HMOX1* knocked-down cells with or without 2'3'-cGAMP stimulation.

(G) Immunoblot analysis for wildtype HO-1 or HO-1H25A expression in HK1 cells.

(A,B,C,D) *P*-value by One-way ANOVA. Data are shown as the mean ± SD. (E) *P*-value by Student's t-test.

Data are shown as the mean ± SD. All *P*-value < 0.05 as statistic difference. \**P*<0.05; \*\**P*<0.01; \*\*\**P*<0.001;

\*\*\*\**P*<0.0001. n=3 three biologically independent experiments, unless otherwise indicated.

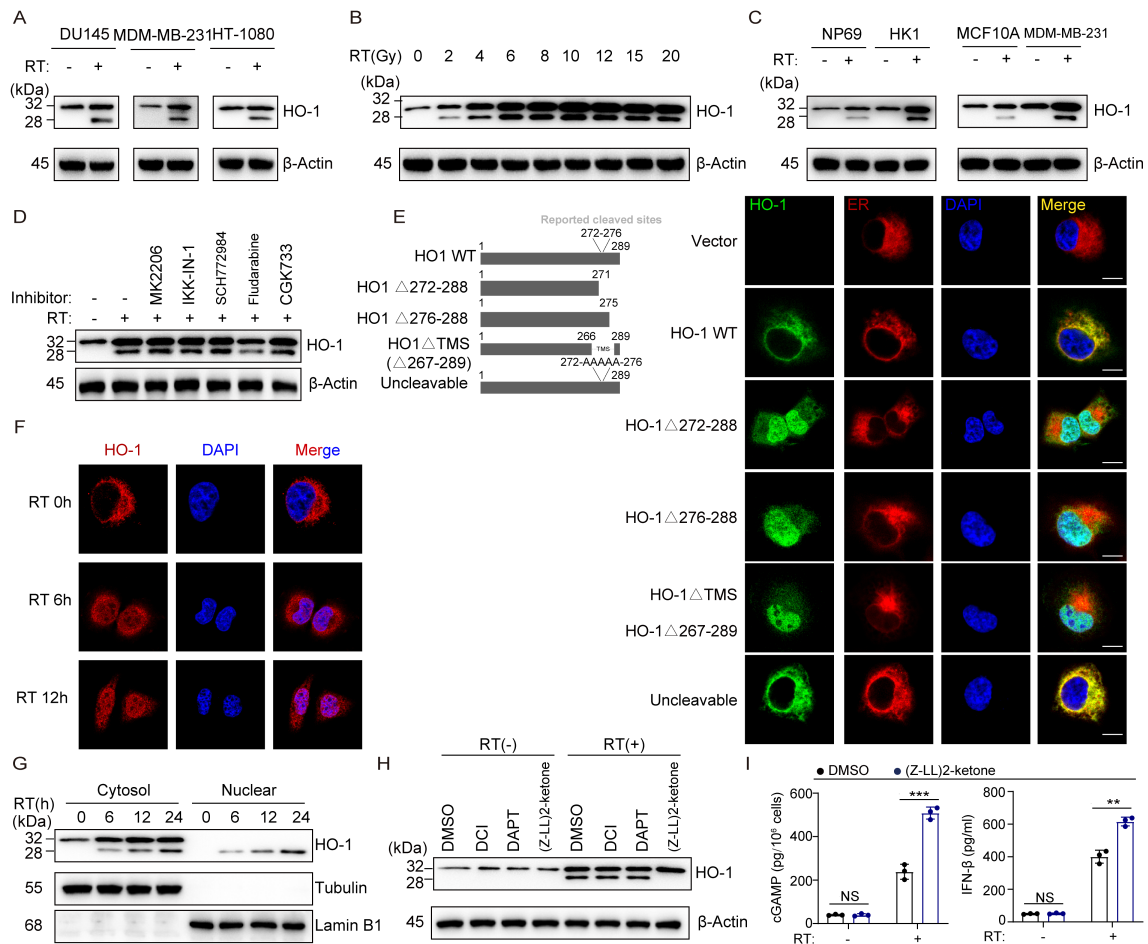

#### Supplemental Figure 4. RT induces HO-1 and promotes its cleavage.

(A) Immunoblot analysis of HO-1 expression and truncation in indicated cell lines before and after RT.

(B) Immunoblot analysis of HO-1 expression and truncation in HK1 cells stimulated with indicated RT doses.

(C) Immunoblot analysis of HO-1 expression and truncation in indicated normal and tumor cell lines before and after RT.

(D) HK1 cells were pretreated with indicated inhibitors (MK2206, an AKT inhibitor, targeting PI3K-AKT pathway; IKK-IN-1, an IKK inhibitor, targeting NF- $\kappa$ B pathway; SCH772984, an ERK inhibitor, targeting MAPK pathway; Fludarabine, an STAT1 inhibitor, targeting Jak-STAT1 pathway; CGK733, an ATR inhibitor). After RT, HO-1 expression was determined with immunoblot analysis.

(E) Subcellular distribution (ER and nucleus) of HO-1 or indicated mutants was determined with immunofluorescence staining in HK1 cells. Calreticulin staining for ER; DAPI staining for nucleus; scale bar, 10  $\mu$ m.

(F) Subcellular distribution of endogenous HO-1 was determined with immunofluorescence staining in HeLa cells stimulated with RT (scale bar, 10  $\mu$ m).

(G) Nuclear and cytoplasmic protein extraction experiment was performed to determine the cellular localization of endogenous HO-1 at indicated timepoint of RT in HeLa cells.

(H) HK1 cells were pretreated with indicated intramembrane protease inhibitors (DCI: an inhibitor of Rhomboid serine proteases; DAPT: an inhibitor of  $\gamma$ -secretase; (Z-LL)2-ketone: an inhibitor of SPP). Before and after RT, HO-1 expression and truncation was determined with immunoblot analysis.

(I) HK1 cells were pretreated with (Z-LL)2-ketone (an inhibitor of SPP). cGAMP (I) or IFN- $\beta$  (J) production was determined with ELISA before and after RT. *P*-value by Student's *t*-test. *P*-value < 0.05 as statistic difference. Data are shown as the mean  $\pm$  SD. \**P*<0.05; \*\**P*<0.01; \*\*\**P*<0.001; \*\*\*\**P*<0.0001.

All representative data from one experiment are shown (n = 3 biologically independent experiments).



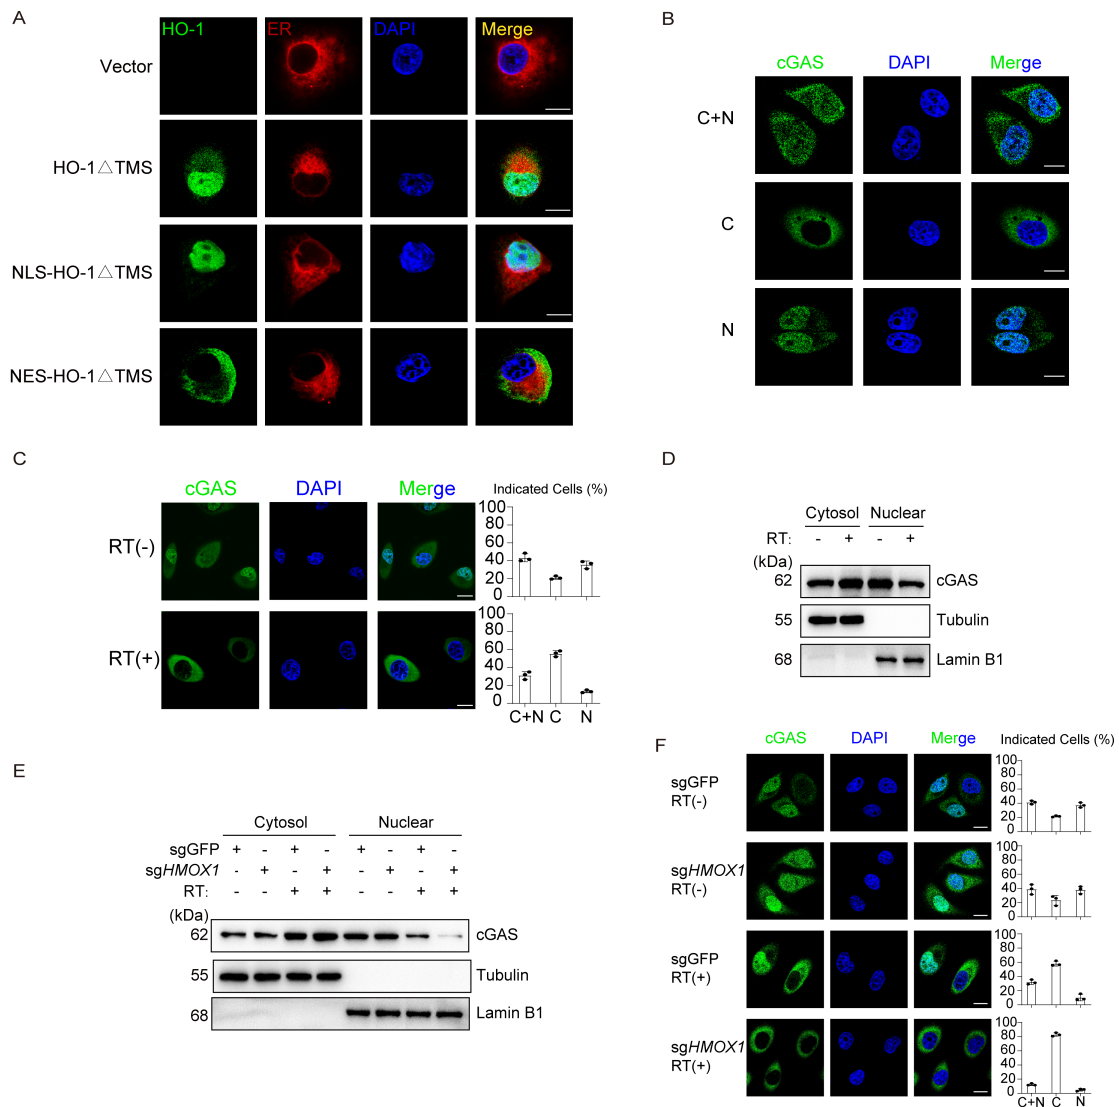

**Supplemental Figure 5. Cleaved HO-1 directly interacts with cGAS and inhibits its nuclear export.**

(A) Subcellular distribution of HO-1 mutants (ER and nucleus) was determined with immunofluorescence staining in HK1 cells (related to 5A-E). Calreticulin staining for ER; DAPI staining for nucleus; scale bar, 10  $\mu$ m.

(B) Definition of subcellular location of cGAS: N, predominantly nuclear; C, predominately cytoplasm; C+N, evenly distributed in the nucleus and cytoplasm (scale bar, 10  $\mu$ m).

(C,F) Subcellular distribution (cytoplasm and nucleus) of cGAS before and after RT was determined with immunofluorescence staining in HeLa cells (scale bar, 10  $\mu$ m).

(D,E) The cytoplasmic and nuclear protein fractions were extracted for immunoblot analysis to determine the subcellular localization of cGAS before and after RT in HeLa cells.

(C,F) The percentages of N-, C-, or C+N-containing cells in 200 cells (N, predominantly nuclear; C, predominately cytoplasm; C+N, evenly distributed in the nucleus and cytoplasm) were calculated. Representative data from one experiment are shown (n = 3 biologically independent experiments). (C,F) Data are shown as the mean  $\pm$  SD.

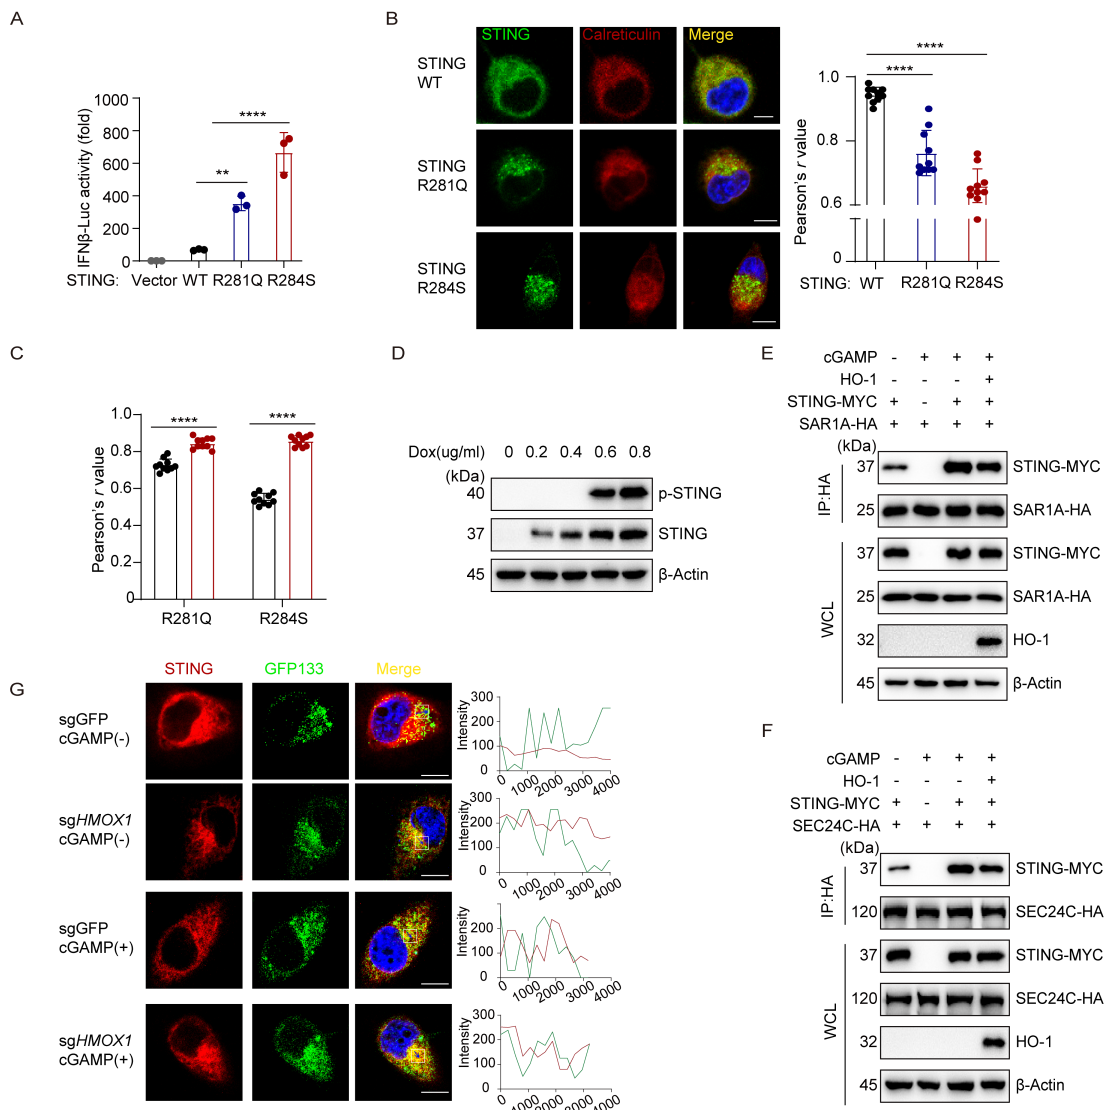

**Supplemental Figure 6. HO-1 inhibits STING oligomerization and consecutive ER-to-Golgi translocation by direct interaction.**

(A) Luciferase reporter assay for HEK293T cells transfected with wild-type STING or indicated STING mutants, *IFNB1* promoter luciferase reporter and Renilla.

(B) HEK293T cells were stably transfected with wild-type STING or indicated STING mutants, followed by confocal imaging. Pearson's correlation coefficient was analyzed and quantified using ImageJ.

(C) Pearson's correlation coefficient of Figure 7H was quantified using ImageJ.

(D) HK1 cells were stably transfected with doxycycline-induced STING expression plasmids. After doxycycline (DOX) treatment with indicated dose, total and phosphorylated STING determined with immunoblot analysis.

(E,F) The interaction in HEK293T cells overexpressing MYC-tagged STING and HA-tagged SAR1A (E) or SEC24C (F) was analyzed by immunoprecipitation with or without 2'3'-cGAMP treatment.

(G) 2'3'-cGAMP induced ER membrane curvature in HK1 cells. Colocalizations of STING and ER membrane curvature probed with GFP133 were determined with immunofluorescence staining.

(B,C)n = 10 cells were quantified in a blind manner. (A,B) *P*-value by One-way ANOVA. (C) *P*-value by Student's t-test. All data are shown as the mean  $\pm$  SD. *P*-value < 0.05 as statistic difference. \**P*<0.05; \*\**P*<0.01; \*\*\**P*<0.001; \*\*\*\**P*<0.0001. 10  $\mu$ m for all scale bars.

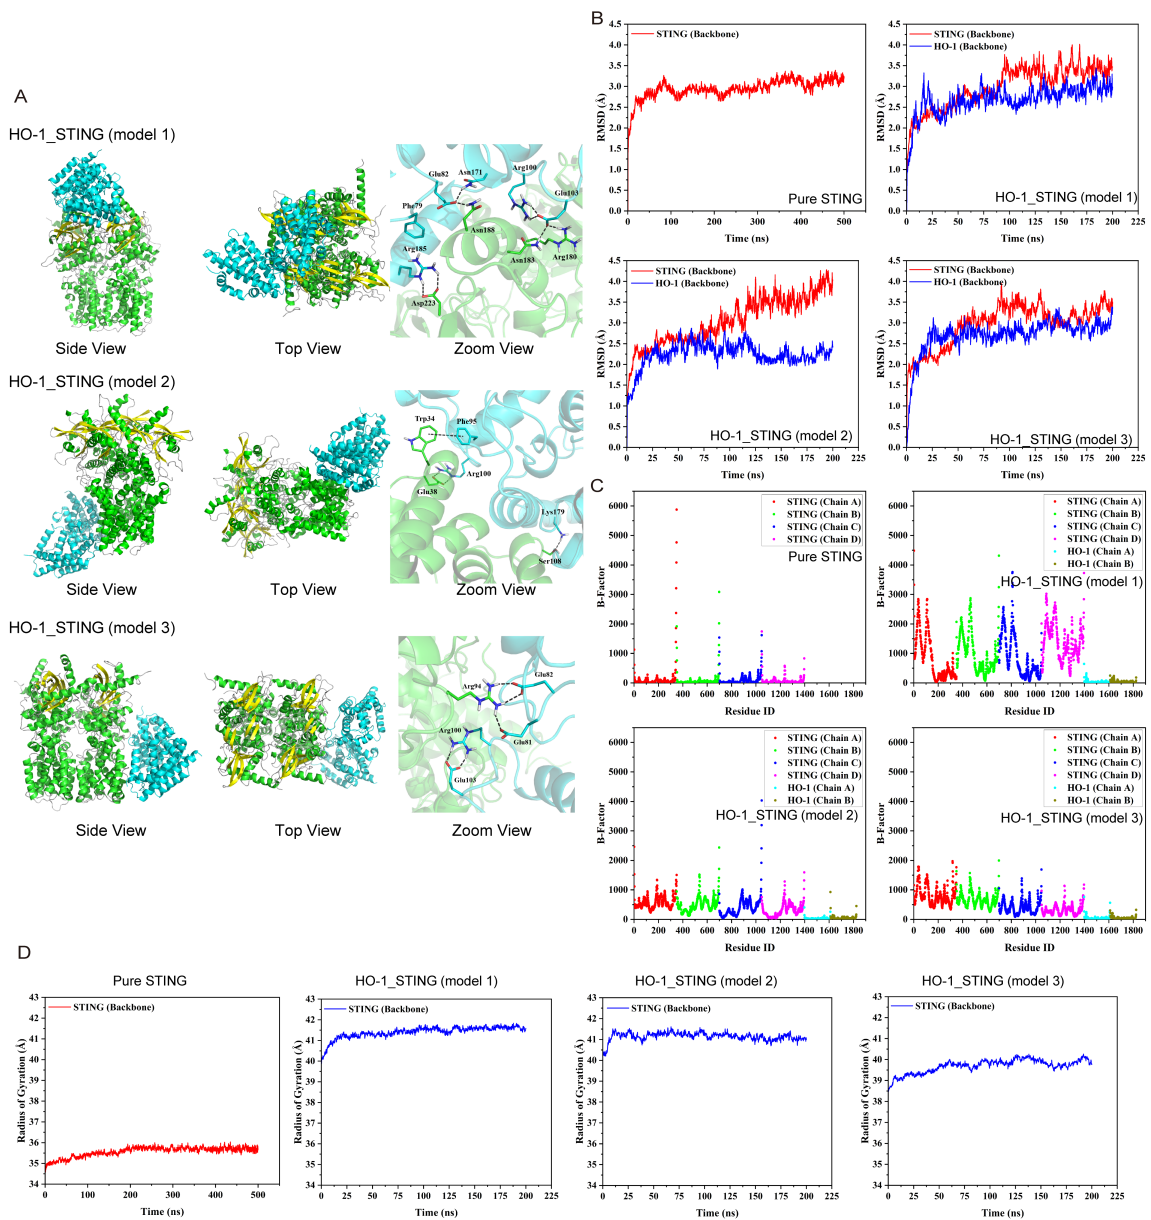

**Supplemental Figure 7. Molecular docking of HO-1 and STING.**

(A) The view of binding modes between the STING tetramer and HO-1 dimer based on MD simulations.

(B-D) RMSD (B), RMSF (C) and Rg (D) in the pure human STING tetramer model and HO-1 dimer+STING tetramer complexes during the MD simulations.

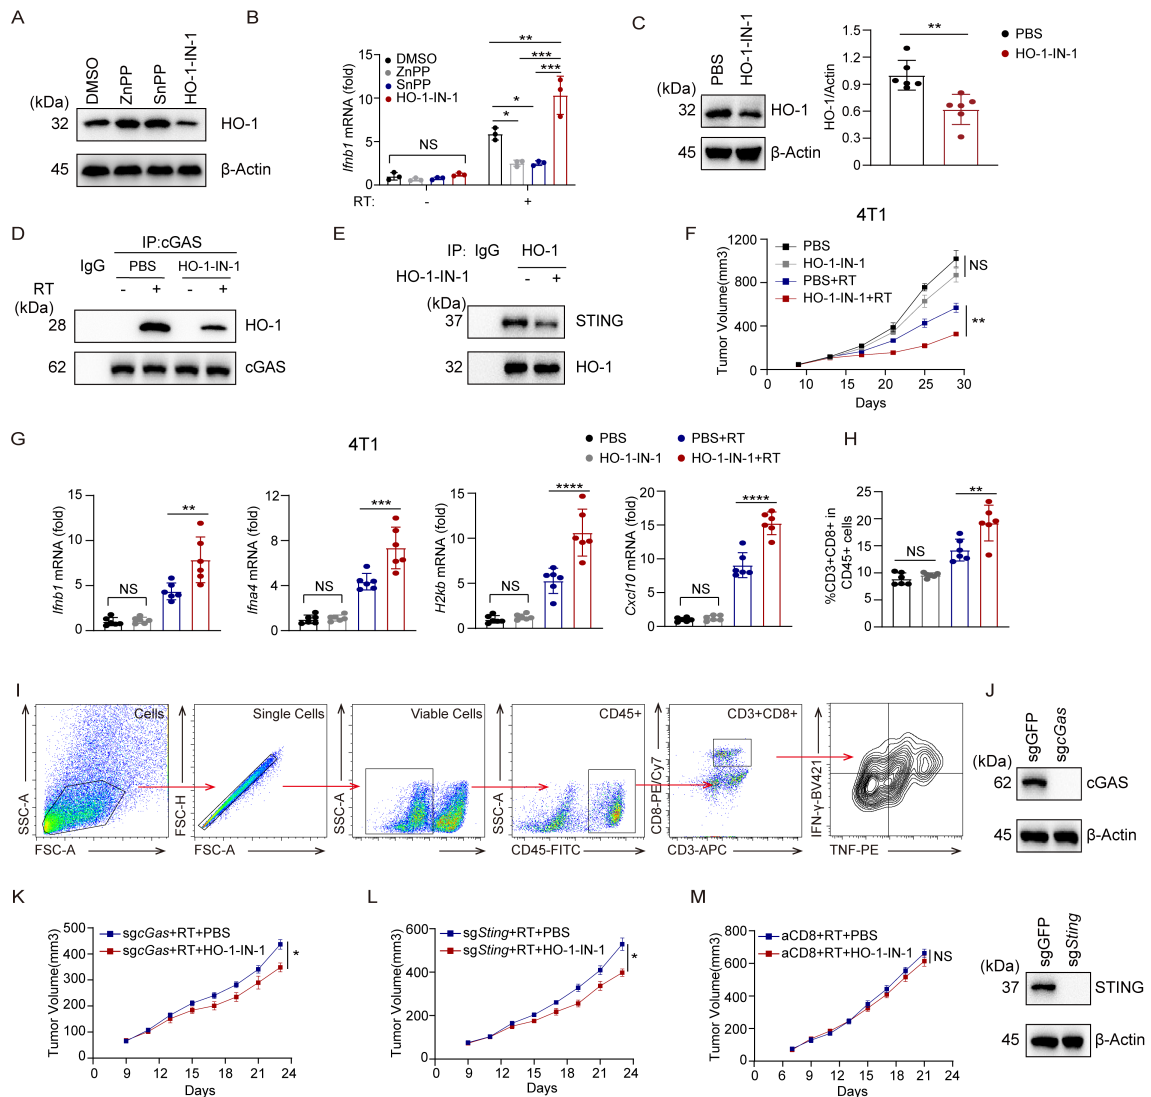

**Supplemental Figure 8. HO-1 inhibitor enhances the efficacy and abscopal effect of RT in vivo.**

(A) Immunoblot analysis of HO-1 expression after treating with indicated HO-1 inhibitors in MC38 cells.

(B) Quantitative PCR analysis for *Irfb1* mRNA levels of MC38 cells treated as indicated (n=3 in each group).

(C) Immunoblot analysis of HO-1 expression in MC38-bearing mice treated with or without HO-1-IN-1 (n=6 in each group).

(D) Endogenous HO-1-cGAS interaction was analyzed by immunoprecipitation in MC38 cells treated as indicated.

(E) Endogenous HO-1-STING interaction was analyzed by immunoprecipitation in MC38 cells treated as indicated.

(F-H) The effect of HO-1 inhibitor combined with RT on tumor growth (F), mRNA levels of typical IFN-Is and ISGs (G), and CD8+ T infiltration (H) of 4T1 tumors. (n=6 in each group).

(I) Representative flow cytometry plot of gating strategy to identify IFN-γ+ and TNF-α+ in CD8+ T cells (related to Figure 9J).

(J) *cGas* and *Sting* knocking-out efficiency of MC38 cells were determined with immunoblot analysis.

(K, L) Tumor growth of *cGas*- (I) or *Sting*-deficient (J) MC38 tumors under RT. Tumor-bearing mice were treated with or without HO-1 inhibitor. (n=6 in each group).

(M) Tumor growth of anti-CD8 neutralizing antibody treated MC38 tumors combined with or without HO-1 inhibitor. (n=6 in each group).

(B,C,G,H) *P*-value by One-way ANOVA. Data are shown as the mean ± SD. (F, K,L,M) *P*-value by Two-way ANOVA. Data are shown as the mean ± SEM. All *P*-value < 0.05 as statistic difference. \**P*<0.05; \*\**P*<0.01; \*\*\**P*<0.001; \*\*\*\**P*<0.0001.

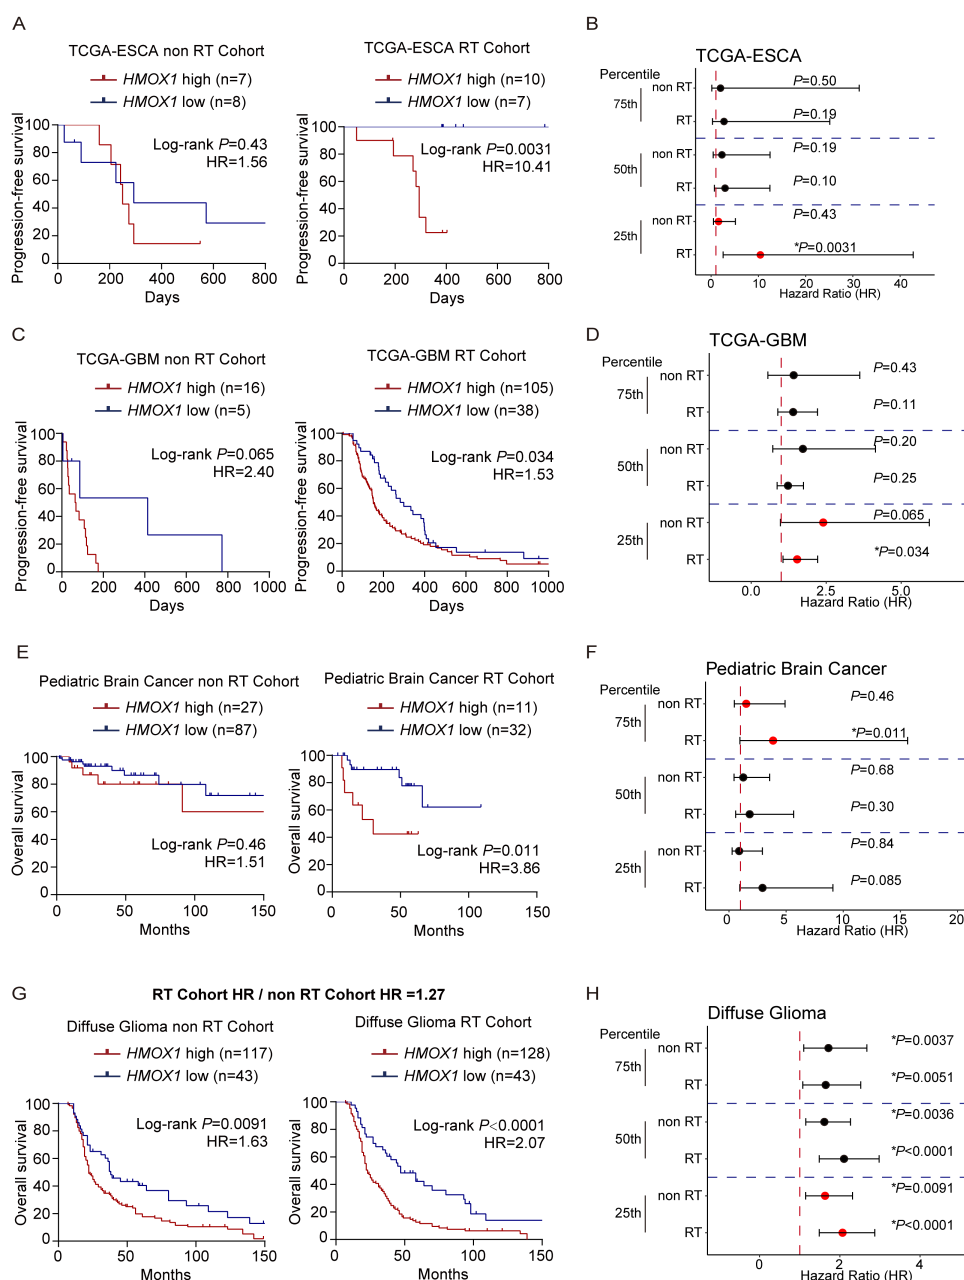

**Supplemental Figure 9. High expression of HO-1 correlates with unfavorable radiotherapy prognosis.**

Quartiles were used as the cut-off point to distinguish between patient groups classified as "low" and "high" based on HO-1 expression. Subsequently, patients were divided into non-radiotherapy group or radiotherapy group according to the available documented information, and patients without recorded radiotherapy information were not included in the Kaplan-Meier analysis.

(A,C) Kaplan-Meier analysis of progression-free survival according to *HMOX1* expression in TCGA ESCA dataset of patients without metastasis (A) or TCGA GBM dataset (B). The lower-quartile was used as the cut-off point.

(E,G) Kaplan-Meier analysis of overall survival according to HO-1 expression in Pediatric Brain Cancer dataset (E) or Diffuse Glioma dataset (G) of patients. The upper-quartile was used as the cut-off point for (E), and the lower-quartile percentile was used as the cut-off point for (G).

(B,D,F,H) Kaplan-Meier analysis for the 25<sup>th</sup>, 50<sup>th</sup>, 75<sup>th</sup> percentiles of HO-1 expression in TCGA-ESCA dataset (B), TCGA GBM dataset (D), Pediatric Brain Cancer dataset (F) or Diffuse Glioma dataset (H). Data were presented as forest plots based on Hazard Ratio (HR) and 95% confidence interval. Red dashed line indicated HR=1.

(A-H) The  $P$  values were determined using the log-rank test. All  $P$ -value < 0.05 as statistic difference.

**Supplemental Table 1. The key contact list between STING dimer-HO-1 dimer.**

|          | <b>STING Residue</b> | <b>HO-1 Residue</b> | <b>Interaction Type</b>                    |
|----------|----------------------|---------------------|--------------------------------------------|
| <b>1</b> | His16                | Thr222              | $\sigma$ - $\pi$ interaction/Hydrogen Bond |
| <b>2</b> | Gln266               | Arg100              | Hydrogen Bond                              |
| <b>3</b> | Gln273               | Arg100              | Hydrogen Bond                              |
| <b>4</b> | Tyr274               | Tyr97               | Hydrogen Bond                              |
| <b>5</b> | Glu340               | Arg113              | Salt Bridge                                |
| <b>6</b> | Glu340               | Gln212              | Hydrogen Bond                              |



**Supplemental Table 2. Changes in binding affinity ( $\Delta\Delta G$ ) of STING dimer binding to HO-1 dimer upon HO-1 mutation.**

|          | STING Residue | HO-1 Residue                 | HO-1 Mutation | Interaction Energy<br>(kcal/mol) | $\Delta \Delta G$<br>(kcal/mol) |
|----------|---------------|------------------------------|---------------|----------------------------------|---------------------------------|
| <b>0</b> |               |                              | Wildtype      | -14.46                           | 0                               |
| <b>1</b> | His16         | Thr222                       | T222A         | -14.26                           | 0.20                            |
| <b>2</b> | Gln266        | Arg100                       | R100A         | -14.07                           | 0.39                            |
| <b>3</b> | Gln273        | Arg100                       | R100A         | -13.80                           | 0.66                            |
| <b>4</b> | Tyr274        | Tyr97                        | Y97A          | -13.27                           | 1.19                            |
| <b>5</b> | Glu340        | Arg113                       | R113A         | -13.45                           | 1.01                            |
| <b>6</b> | Glu340        | Gln212                       | Q212A         | -11.79                           | 2.67                            |
| <b>7</b> |               | Y97A,R100A,R113A,Q212A,T222A |               | -11.79                           | 2.67                            |

**Supplemental Table 3. The binding free energy (in kcal/mol) and its components obtained from the MM/PBSA calculation for STING tetramer and STING dimer-HO-1 dimer.**

| <b>Contribution</b>   | <b>STING tetramer</b> | <b>STING dimer-HO-1 dimer</b> |
|-----------------------|-----------------------|-------------------------------|
| $\Delta E_{vdw}$      | -538.96               | -547.52                       |
| $\Delta E_{ele}$      | -658.16               | -700.38                       |
| $\Delta G_{polar}$    | 1047.75               | 1044.24                       |
| $\Delta G_{nonpolar}$ | -94.31                | -76.57                        |
| $\Delta G_{total}$    | -243.68               | -280.23                       |

**Supplemental Table 4.** Correlations between HO-1 expression and the clinical

| Characteristic                 | Low expression group<br>N=104(100%) | High expression group<br>N=116(100%) | P value* |
|--------------------------------|-------------------------------------|--------------------------------------|----------|
| <b>Age (years)</b>             |                                     |                                      |          |
| <45                            | 51(49.0)                            | 51(44.0)                             | 0.451    |
| ≥45                            | 53(51.0)                            | 65(56.0)                             |          |
| <b>Gender</b>                  |                                     |                                      |          |
| Male                           | 73(70.2)                            | 93(80.2)                             | 0.086    |
| Female                         | 31(29.8)                            | 23(19.8)                             |          |
| <b>TNM stage</b>               |                                     |                                      |          |
| I+II                           | 36(34.6)                            | 38(32.8)                             | 0.771    |
| III+IV                         | 68(65.4)                            | 78(67.2)                             |          |
| <b>VCA-IgA titre</b>           |                                     |                                      |          |
| <1:80                          | 13(12.5)                            | 9(7.8)                               | 0.476    |
| ≥1:80                          | 83(79.8)                            | 99(85.3)                             |          |
| NA                             | 8(7.7)                              | 8(6.9)                               |          |
| <b>EA-IgA titre</b>            |                                     |                                      |          |
| <1:10                          | 31(29.8)                            | 19(16.4)                             | 0.040    |
| ≥1:10                          | 63(60.6)                            | 88(75.9)                             |          |
| NA                             | 10(9.6)                             | 9(7.8)                               |          |
| <b>Death</b>                   |                                     |                                      |          |
| No                             | 92(88.5)                            | 83(71.6)                             | 0.002    |
| Yes                            | 12(11.5)                            | 33(28.4)                             |          |
| <b>Disease</b>                 |                                     |                                      |          |
| No                             | 87(83.7)                            | 70(60.3)                             | 0.000    |
| Yes                            | 17(16.3)                            | 46(39.7)                             |          |
| <b>Recurrence</b>              |                                     |                                      |          |
| No                             | 95(91.3)                            | 94(81.0)                             | 0.028    |
| Yes                            | 9(8.7)                              | 22(19.0)                             |          |
| <b>Concurrent Chemotherapy</b> |                                     |                                      |          |
| No                             | 49(47.1)                            | 44(37.9)                             | 0.107    |
| Yes                            | 55(52.9)                            | 72(62.1)                             |          |

characteristics of patients with NPC.

\*Two-sided Chi-square test. All patients were restaged according to the AJCC Cancer Staging Manual, 7th edition.

**Supplemental Table 5. List of reagents used in this study.**

| REAGENTS or RESOURCE                                   | SOURCE                                                                                         | CATALOGUE       |
|--------------------------------------------------------|------------------------------------------------------------------------------------------------|-----------------|
| <b>Chemicals</b>                                       |                                                                                                |                 |
| 2'3'-cGAMP                                             | InvivoGen                                                                                      | tlrl-nacga23    |
| Digitonin                                              | Sigma-Aldrich                                                                                  | 11024-24-119887 |
| IKK-IN-1                                               | MCE                                                                                            | HY-13873        |
| SCH772984                                              | MCE                                                                                            | HY-50846        |
| Fludarabine                                            | MCE                                                                                            | HY-B0069        |
| CGK733                                                 | GLPBIO                                                                                         | GC14526         |
| 3,4-Dichloroisocoumarin                                | Cayman                                                                                         | 21194           |
| DAPT                                                   | Selleck                                                                                        | S2215           |
| (Z-LL) <sub>2</sub> Ketone                             | Sigma-Aldrich                                                                                  | 313664-40-3     |
| Heme Oxygenase-1-IN-1                                  | MCE                                                                                            | 1093058-52-6    |
| Zn(II)-protoporphyrin (ZnPP)                           | MCE                                                                                            | HY-101193       |
| Tin-protoporphyrin IX (SnPP)                           | MCE                                                                                            | HY-101194       |
| Recombinant Human IFN-β                                | PeptoTech                                                                                      | 300-02BC        |
| Doxycycline                                            | MCE                                                                                            | HY-N0565B       |
| 5'ppp-dsRNA                                            | InvivoGen                                                                                      | tlrl-3prna      |
| Puromycin                                              | TargetMol                                                                                      | T19978          |
| Penicillin–streptomycin                                | Gibco                                                                                          | 15140122        |
| <b>Critical commercial assays</b>                      |                                                                                                |                 |
| Human IFN-β ELISA kit                                  | Neobioscience                                                                                  | EHC026          |
| cGAMP ELISA kit                                        | Cayman                                                                                         | 501700          |
| Dual luciferase assay kit                              | Promega                                                                                        | E1910           |
| NE-PER Nuclear and Cytoplasmic Extraction Reagents     | Thermofisher                                                                                   | 78835           |
| <b>Cell lines</b>                                      |                                                                                                |                 |
| HK1, human nasopharyngeal carcinoma cell line          | A gift from Prof. M.S. Zeng, Sun Yat-sen University Cancer Center, Guangzhou, China            |                 |
| NP69, human normal nasopharyngeal epithelial cell line |                                                                                                |                 |
| HeLa, human cervical cancer cell line                  | ATCC                                                                                           |                 |
| DU145, human prostate cancer cell line                 | ATCC                                                                                           |                 |
| MDM-MB-231, human breast epithelial cell line          | ATCC                                                                                           |                 |
| HT-1080, human fibrosarcoma cell line                  | ATCC                                                                                           |                 |
| HEK293T, human embryonic kidney 293T cell line         | ATCC                                                                                           |                 |
| B16, mouse melanoma cell line                          | ATCC                                                                                           |                 |
| MC38, mouse colon adenocarcinoma cell line             | ATCC                                                                                           |                 |
| 4T1, mouse breast cancer cell line                     | ATCC                                                                                           |                 |
| MCF10A, human normal breast epithelial cell line       | ATCC                                                                                           |                 |
| <b>Experimental models: Organisms/strains</b>          |                                                                                                |                 |
| <i>Homx1<sup>fl/fl</sup></i> mice                      | Institute of Laboratory Animal Science, CAMS&PUMC                                              |                 |
| <i>Lyz<sup>Cre/Cre</sup></i> mice                      | A gift from Professor Xiaojun Xia; the Sun Yat-sen University Cancer Center (Guangzhou, China) |                 |
| huHSC-NCG                                              | GemPharmatech Co.,Ltd.                                                                         |                 |
| C57BL/6 and BALB/c                                     | Guangdong Medical Laboratory Animal Center (Foshan, China) and GemPharmatech Co.,Ltd.          |                 |

**Supplemental Table 6. Primer sequences for qPT-PCR, siRNA, shRNA, and sgRNA assays**

| Name                                | Forward                      | Reverse                       |
|-------------------------------------|------------------------------|-------------------------------|
| <b>Primer sequences for qRT-PCR</b> |                              |                               |
| HMOX1                               | 5'-AAGACTGCGTTCCTGCTCAAC-3'  | 5'-AAAGCCCTACAGCAACTGTCTG-3'  |
| CYB5R2                              | 5'-AGGAGGAGAGAGCCAATCACC-3'  | 5'-ACATAGTTACCTACAGGAAGCCC-3' |
| GPI                                 | 5'-CAAGGACCGCTTCAACCACTT-3'  | 5'-CCAGGATGGGTGTGTTTGACC-3'   |
| KDSR                                | 5'-GTGGCATCGGGAAGTGCAT-3'    | 5'-AAGCACCACTGTTTGTGCTT-3'    |
| SLC35A5                             | 5'-GTGCTGAAGAGGCGTCTAAAC-3'  | 5'-GTCCTGCCAAGTTGTGCTGT-3'    |
| MYC                                 | 5'-GGCTCCTGGCAAAGGTCA-3'     | 5'-CTGCGTAGTTGTGCTGATGT-3'    |
| MCCC1                               | 5'-GCTGCACAGGCTATCCATCC-3'   | 5'-CACCATGATAACCCTCCACAAC-3'  |
| SCAP                                | 5'-TATCTCGGGCCTTCTACAACC-3'  | 5'-GGGGCGAGTAATCCTTCACA-3'    |
| NDUFA11                             | 5'-GCCGAAGGTTTTTCGTCAAGTA-3' | 5'-GGAGGATTGAGTGTGACTCTGT-3'  |
| KCTD21                              | 5'-GTGACGGCAAAGTGTTCG-3'     | 5'-GTTGGCGTTGAAGACCTCCAT-3'   |
| IFNA2                               | 5'-GCTTGGGATGAGACCCTCCTA-3'  | 5'-CCCACCCCTGTATCACAC-3'      |
| IFNB1                               | 5'-GCTTGGATTCTACAAGAAGCA-3'  | 5'-ATAGATGGTCAATGCGGCGTC-3'   |
| HLA-A                               | 5'- GACGCCCCAAAACGCATA-3'    | 5'- TGGGCAAACCCTCATGCTG -3'   |
| CXCL10                              | 5'-GTGGCATTCAAGGAGTACCTC-3'  | 5'-TGATGGCCTTCGATTCTGGATT-3'  |
| Ifnb1(mouse)                        | 5'-CAGCTCCAAGAAAGGACGAAC-3'  | 5'-GGCAGTGTAACCTTCTGCAT-3'    |
| Ifna4(mouse)                        | 5'-TGATGAGCTACTACTGGTCAGC-3' | 5'-GATCTCTTAGCACAAAGGATGGC-3' |
| H2-kb(mouse)                        | 5'- ACCAGCAGTACGCCTACGA -3'  | 5'- AACCAGAACAGCAACGGTCTG-3'  |
| Cxcl10 (mouse)                      | 5'-CCAAGTGCTGCCGTCATTTTC-3'  | 5'-GGCTCGCAGGGATGATTTCAA-3'   |
| <b>Primer sequences for siRNA</b>   |                              |                               |
| TRIF-1                              | 5'-GCCAGGACAAGCUUUGUATT-3'   | 5'-UACAAGAGCUUUGUCCUGGCTT-3'  |
| TRIF-2                              | 5'-GGAUCUCUCUAGAGGCAUUTT-3'  | 5'-AAUGCCUCUAGAGAGAUCCTT-3'   |
| MAVS-1                              | 5'- CUGCCGCAAUUUCAGCAAUTT-3' | 5'- AUUGCUGAAAUUGCGGCAGTT-3'  |

|                            |                                                                      |                              |
|----------------------------|----------------------------------------------------------------------|------------------------------|
| MAVS-2                     | 5'- GCUGUGAGCUAGUUGAUCUTT-3'                                         | 5'- AGAUCAACUAGCUCACAGCTT-3' |
| STING-1                    | 5'- GCCCUUCACUUGGAUGCUUTT-3'                                         | 5'- AAGCAUCCAAGUGAAGGGCTT-3' |
| STING-2                    | 5'- CCGGAUUCGAACUACAAUTT-3'                                          | 5'- AUUGUAAGUUCGAAUCCGGTT-3' |
| HMOX1-1                    | 5'-CAGUUGCUGUAGGGCUUUATT-3'                                          | 5'-UAAAGCCCUACAGCAACUGTT-3'  |
| HMOX1-2                    | 5'-CUGGAAGACACCCUAAUGUTT-3'                                          | 5'-ACAUUAGGGUGUCUUCAGTT-3'   |
| CYB5R2-1                   | 5'-GGAGAGAGCCAAUCACCUUTT-3'                                          | 5'-AAGGUGAUUGGCUCUCUCCTT-3'  |
| CYB5R2-2                   | 5'-GCUUUGUGGACCUAAUUAUTT-3'                                          | 5'-AUAAUUAGGUCCACAAAGCTT-3'  |
| GPI-1                      | 5'-CCAGGAGACCAUCACGAAUTT-3'                                          | 5'-AUUCGUGAUGGUCUCCUGGTT-3'  |
| GPI-2                      | 5'-GCUCACACCAUUCAUGCUUTT-3'                                          | 5'-AAGCAUGAAUGGUGUGAGCTT-3'  |
| KDSR-1                     | 5'-GCAUUGCUAUCGAGUGCUATT-3'                                          | 5'-UAGCACUCGAUAGCAAUGCTT-3'  |
| KDSR-2                     | 5'-GCAGGACAGUUGGGAUUAUTT-3'                                          | 5'-AUAAUCCCAACUGUCCUGCTT-3'  |
| SLC35A5-1                  | 5'-GGGCUUCCCUCCUGACUUUTT-3'                                          | 5'-AAAGUCAGGAGGGAAGCCCTT-3'  |
| SLC35A5-2                  | 5'-GGAAUACGCACCUAGGCAATT-3'                                          | 5'-UUGCCUAGGUGCGUAUUCCTT-3'  |
| MYC-1                      | 5'-GGAAGAAAUCGAUGUUGUUTT-3'                                          | 5'-ACAACAUCGAUUUCUUCCTT-3'   |
| MYC-2                      | 5'-GGAAACGACGAGAACAGUUTT-3'                                          | 5'-AACUGUUCUCGUCGUUUCCTT-3'  |
| MCCC-1                     | 5'-GGAAUGAGGAUUGUUAGAUTT-3'                                          | 5'-AUCUAACAAUCCUCAUUCCTT-3'  |
| MCCC-2                     | 5'-CACCAACAUUGACUUCUUATT-3'                                          | 5'-UAAGAAGUCAAUUGGUGTT-3'    |
| SCAP-1                     | 5'-CCUACCUUGUGGUGGUUAUTT-3'                                          | 5'-AUAACCACCACAAGGUAGGTT-3'  |
| SCAP-2                     | 5'-CGACGCUCUUCAGCUAUUATT-3'                                          | 5'-UAAUAGCUGAAGAGCGUCGTT-3'  |
| NDUFA11-1                  | 5'-CCACCAGUAUUGCCAGCGUTT-3'                                          | 5'-ACGCUGGCAAUACUGGUGGTT-3'  |
| NDUFA11-2                  | 5'-GCCUGCGUGUACUUUGGCATT-3'                                          | 5'-UGCCAAAGUACACGCAGGCTT-3'  |
| KCTD21-1                   | 5'-GGGAAGCUCUAUACAACCUTT-3'                                          | 5'-AGGUUGUAUAGAGCUUCCCTT-3'  |
| KCTD21-2                   | 5'-GCAAAGUGUUCGCUAUUAUTT-3'                                          | 5'-AUAUAGCGGAACACUUUGCTT-3'  |
| Primer sequences for shRNA |                                                                      |                              |
| Hmox1-1(mouse)             | 5'-CCGG-AGCCACACAGCACTATGTAAA-CTCGAG-TTTACATAGTGCTGTGTGGCT-TTTTTT-3' |                              |



|                            |                                                                        |                                  |
|----------------------------|------------------------------------------------------------------------|----------------------------------|
| Hmox1-2(mouse)             | 5'- CCGG-ACAGTGGCAGTGGGAATTTAT-CTCGAG-ATAAATTCCTACTGCCACTGT-TTTTTT -3' |                                  |
| Primer sequences for sgRNA |                                                                        |                                  |
| HMOX1-1                    | 5'-CACCGAGGGCCTCTGACAAATCCTG-3'                                        | 5'-AAACCAGGATTTGTCAGAGGCCCTC-3'  |
| HMOX1-2                    | 5'-CACCGAAGGGCCAGGTGACCCGAGA-3'                                        | 5'-AAACTCTCGGGTCACCTGGCCCTTC-3'  |
| cGAS-1                     | 5'-CACCGCCGCGATGATATCTCCACGG-3'                                        | 5'-AAACCCGTGGAGATATCATCGCGGC-3'  |
| cGAS-2                     | 5'-CACCGGCTTCCGCACGGAATGCCAG-3'                                        | 5'-AACCTGGCATTCCGTGCGGAAGCC-3'   |
| STING-1                    | 5'-CACCGGCTGGGACTGCTGTAAACG-3'                                         | 5'-AAACCGTTTAACAGCAGTCCCAGCC-3'  |
| STING-2                    | 5'-CACCGCCATCCATCCCGTGCCAG-3'                                          | 5'-AACCTGGGACACGGGATGGATGGC-3'   |
| Sting-1(mouse)             | 5'-CACCGCCAGCCATCCCACGGCCCAG-3'                                        | 5'-AACCTGGGCCGTGGGATGGCTGGC-3'   |
| Sting-2(mouse)             | 5'-CACCGTGTAGCCCTCATCTTTCTGG-3'                                        | 5'-AAACCCAGAAAGATGAGGGCTACAC-3'  |
| cGas-1(mouse)              | 5'-CACCGGAAACGCAAAGATATCTCGG -3'                                       | 5'-AAACCCGAGATATCTTTGCGTTTCC -3' |
| cGas-2(mouse)              | 5'- CACCGCGAGACGGTGAATAAAGTTG-3'                                       | 5'-AAACCAACTTTATTCACCGTCTCGC -3' |

**Supplemental Table 7. List of antibodies used in this study.**

| <b>Antibodies used for Western blotting (WB) and immunoprecipitation (IP).</b> |                           |           |             |              |                  |       |                                |
|--------------------------------------------------------------------------------|---------------------------|-----------|-------------|--------------|------------------|-------|--------------------------------|
| Primary antibodies                                                             | Supplier                  | Catalogue | Application | Host species | Species activity | clone | Dilution                       |
| anti-cGAS                                                                      | Cell Signaling Technology | 79978     | WB          | Rabbit       | Hu               | E5V3W | 1:1000                         |
| anti-cGAS                                                                      | Cell Signaling Technology | 31659     | WB, IP      | Rabbit       | Mo               | D3O8O | 1:1000 for WB,<br>1:200 for IP |
| anti-cGAS                                                                      | Cell Signaling Technology | 83623     | IP          | Rabbit       | Hu               | E9G9G | 1:100                          |
| anti-STING                                                                     | Cell Signaling Technology | 13647     | WB, IP      | Rabbit       | Hu, Mo           | D2P2F | 1:2000 for WB,<br>1:50 for IP  |
| anti-pSTING                                                                    | Cell Signaling Technology | 50907     | WB          | Rabbit       | Hu               | E9A9K | 1:1000                         |
| anti-pSTING                                                                    | Cell Signaling Technology | 72971     | WB          | Rabbit       | Mo               | D8F4W | 1:1000                         |
| anti-TBK1                                                                      | Cell Signaling Technology | 38066     | WB          | Rabbit       | Hu               | E8I3G | 1:1000                         |
| anti-pTBK1                                                                     | Cell Signaling Technology | 5483      | WB          | Rabbit       | Hu               | D52C2 | 1:1000                         |
| anti-IRF3                                                                      | Cell Signaling Technology | 4302      | WB          | Rabbit       | Hu               | D83B9 | 1:1000                         |
| anti-pIRF3                                                                     | Cell Signaling Technology | 29047     | WB          | Rabbit       | Hu               | D6O1M | 1:1000                         |
| anti-STAT1                                                                     | Cell Signaling Technology | 14994     | WB          | Rabbit       | Hu               | D1K9Y | 1:1000                         |
| anti-pSTAT1                                                                    | Cell Signaling Technology | 9167      | WB          | Rabbit       | Hu               | 58D6  | 1:1000                         |
| anti-HO-1                                                                      | Cell Signaling Technology | 43966     | WB, IP      | Rabbit       | Hu, Mo           | E3F4S | 1:1000 for WB,<br>1:100 for IP |
| anti-HO-1                                                                      | Cell Signaling Technology | 82551     | WB          | Rabbit       | Hu, Mo           | E7U4W | 1:1000 for WB                  |
| anti-HO-1                                                                      | Cell Signaling Technology | 26416     | WB          | Rabbit       | Hu               | E8B7A | 1:1000 for WB                  |
| anti-CRM1                                                                      | Cell Signaling Technology | 46249     | WB          | Rabbit       | Hu               | D6V7N | 1:1000 for WB                  |
| anti-FLAG                                                                      | Cell Signaling Technology | 14793     | WB          | Rabbit       | Hu               | N. A  | 1:2000                         |
| anti-HA                                                                        | Cell Signaling Technology | 3724      | WB          | Rabbit       | Hu               | N. A  | 1:2000                         |
| anti-Myc                                                                       | Cell Signaling Technology | 2278      | WB          | Rabbit       | Hu               | N. A  | 1:2000                         |

|                                                      |                           |            |             |              |                  |        |                      |
|------------------------------------------------------|---------------------------|------------|-------------|--------------|------------------|--------|----------------------|
| anti-Beta Actin                                      | Proteintech               | 66009      | WB          | Mouse        | Hu, Mo           | 2D4H5  | 1:20000              |
| anti-Alpha Tublin                                    | Proteintech               | 66031      | WB          | Mouse        | Hu, Mo           | 1E4C11 | 1:20000              |
| anti-Lamin B1                                        | Proteintech               | 12987      | WB          | Rabbit       | Hu               | N. A   | 1:10000              |
| anti-Phospho-Histone H2A.X (Ser139)                  | Cell Signaling Technology | 2577       | WB          | Rabbit       | Hu               | N. A   | 1:1000               |
| IgG control Polyclonal antibody                      | Proteintech               | 30000-0-AP | IP          | Rabbit       | Hu               | N. A   | 5µg for IP           |
| Pierce™ Protein A/G Magnetic Beads                   | ThermoFisher              | 88802      | IP          | N. A         | Hu               | N. A   | 25ul per test for IP |
| Pierce™ Anti-DYKDDDDK Magnetic Agarose               | ThermoFisher              | A36797     | IP          | N. A         | Hu               | N. A   | 25ul per test for IP |
| Pierce™ Anti-HA Magnetic Beads                       | ThermoFisher              | 88836      | IP          | N. A         | Hu               | N. A   | 25ul per test for IP |
| Pierce™ Anti-c-Myc Magnetic Beads                    | ThermoFisher              | 88842      | IP          | N. A         | Hu               | N. A   | 25ul per test for IP |
| anti-mouse IgG, HRP-linked Antibody                  | Cell Signaling Technology | 7076       | WB          | Horse        | Mo               | N. A   | 1:5000               |
| anti-rabbit IgG, HRP-linked Antibody                 | Cell Signaling Technology | 7074       | WB          | Goat         | Rabbit           | N. A   | 1:5000               |
| <b>Antibodies used for flow cytometric analysis.</b> |                           |            |             |              |                  |        |                      |
| Primary antibodies                                   | Supplier                  | Catalogue  | Application | Host species | Species activity | clone  | Dilution             |
| FITC anti-mouse CD45                                 | Biologend                 | 103107     | Fc          | Rat          | Mo               | 30-F11 | 5ug per test         |

|                                      |           |        |    |      |      |          |              |
|--------------------------------------|-----------|--------|----|------|------|----------|--------------|
| APC anti- mouse<br>CD3ε              | Biologend | 100311 | Fc | Rat  | Mo   | 145-2C11 | 5ug per test |
| PC7 anti-mouse<br>CD8α               | Biologend | 100721 | Fc | Rat  | Mo   | 53-6.7   | 5ug per test |
| PE anti-mouse TNFα                   | Biologend | 506306 | Fc | Rat  | Mo   | MP6-XT22 | 5ug per test |
| BV421 anti-mouse<br>IFNγ             | Biologend | 505829 | Fc | Rat  | Mo   | XMG1.2   | 5ug per test |
| FITC anti-human<br>CD45              | Biologend | 304006 | Fc | Mo   | Hu   | HI30     | 5ug per test |
| PE anti-human CD3                    | Biologend | 317308 | Fc | Mo   | Hu   | OKT3     | 5ug per test |
| BV605 anti-human<br>CD8              | Biologend | 344741 | Fc | Mo   | Hu   | SK1      | 5ug per test |
| APC anti-human<br>IFN-γ              | Biologend | 502512 | Fc | Mo   | Hu   | 4S.B3    | 5ug per test |
| PE/Cyanine7 anti-<br>human TNF-α     | Biologend | 502929 | Fc | Mo   | Hu   | MAB11    | 5ug per test |
| Zombie NIR™<br>Fixable Viability Kit | Biologend | 423105 | Fc | N. A | N. A | N. A     | 1:1000       |
| Zombie UV™ Fixable<br>Viability Kit  | Biologend | 423107 | Fc | N. A | N. A | N. A     | 1:1000       |

**Antibodies used for immunofluorescence (IF).**

| Primary antibodies | Supplier                  | Catalogue | Application | Host species | Species activity | clone  | Dilution |
|--------------------|---------------------------|-----------|-------------|--------------|------------------|--------|----------|
| anti-HO-1          | Cell Signaling Technology | 82551     | IF          | Rabbit       | Hu               | E7U4W  | 1:3000   |
| anti-HO-1          | Proteintech               | 66743     | IF          | Mouse        | Hu               | 2D10A5 | 1:200    |

|                                                   |                           |             |              |              |                  |       |                      |
|---------------------------------------------------|---------------------------|-------------|--------------|--------------|------------------|-------|----------------------|
| anti-cGAS                                         | Cell Signaling Technology | 79978       | IF           | Rabbit       | Hu               | E5V3W | 1:200                |
| anti-STING                                        | Proteintech               | 19851       | IF           | Rabbit       | Hu               | N. A  | 1:100                |
| 488 conjugated anti-STING                         | Proteintech               | CL488-19851 | IF           | Rabbit       | Hu               | N. A  | 1:100                |
| anti-Calreticulin                                 | Cell Signaling Technology | 12238       | IF           | Rabbit       | Hu               | D3E6  | 1:400                |
| anti-GM130                                        | Cell Signaling Technology | 12480       | IF           | Rabbit       | Hu               | D6B1  | 1: 3000              |
| anti-FLAG                                         | Cell Signaling Technology | 14793       | IF           | Rabbit       | Hu               | N. A  | 1:1000               |
| <b>Antibodies used for Neutralizing antibody.</b> |                           |             |              |              |                  |       |                      |
| Primary antibodies                                | Supplier                  | Catalogue   | Application  | Host species | Species activity | clone | Dilution             |
| anti-mouse CD8 $\alpha$                           | Bioxcell                  | BE0061      | Neutralizing | N. A         | Mo               | 2.43  | 200 $\mu$ g per test |
